# 1 **A survey of proximal methods for monitoring leaf phenology in** 2 **temperate deciduous forests**

3

4 **Kamel Soudani<sup>1</sup>, Nicolas Delpierre<sup>1</sup>, Daniel Berveiller<sup>1</sup>, Gabriel Hmimina<sup>2</sup>, Jean-Yves**  
5 **Pontauiller<sup>1</sup>, Lou Seureau<sup>1</sup>, Gaëlle Vincent<sup>1</sup>, Éric Dufrêne<sup>1</sup>**

6

7 <sup>1</sup> Université Paris-Saclay, CNRS, AgroParisTech, Ecologie Systématique et Evolution,  
8 91405, Orsay, France.

9 <sup>2</sup> Laboratoire de Météorologie Dynamique, IPSL, CNRS/UPMC, Paris, France.

10

11 \* Correspondence: [kamel.soudani@universite-paris-saclay.fr](mailto:kamel.soudani@universite-paris-saclay.fr)

12

## 13 **Highlights**

14

- 15 • We used 8 indirect methods to predict the timing of phenological events.
- 16 • GCC, NDVI and CC captured very well the interannual variation of spring  
17 phenology.
- 18 • GCC, NDVI and CC provided the best estimates of observed budburst dates.
- 19 • NDVI and CC derived-dates correlated with observed leaf senescence dates.

20

## 21 **Abstract**

22 Tree phenology is a major driver of forest-atmosphere mass and energy exchanges. Yet tree  
23 phenology has historically not been recorded at flux measurement sites. Here, we used  
24 seasonal time-series of ground-based NDVI (Normalized Difference Vegetation Index),  
25 RGB camera GCC (Greenness Chromatic Coordinate), broad-band NDVI, LAI (Leaf Area  
26 Index),  $fAPAR$  (fraction of Absorbed Photosynthetic Active Radiation), CC (Canopy  
27 Closure),  $fR_{vis}$  (fraction of Reflected Radiation) and GPP (Gross Primary Productivity) to  
28 predict six phenological markers detecting the start, middle and end of budburst and of leaf  
29 senescence in a temperate deciduous forest. We compared them to observations of budburst  
30 and leaf senescence achieved by field phenologists over a 13-year period. GCC, NDVI and  
31 CC captured very well the interannual variability of spring phenology ( $R^2 > 0.80$ ) and  
32 provided the best estimates of the observed budburst dates, with a mean absolute deviation

33 (MAD) less than 4 days. For the CC and GCC methods, mid-amplitude (50%)  
34 threshold dates during spring phenological transition agreed well with the observed  
35 phenological dates. For the NDVI-based method, on average, the mean observed date  
36 coincides with the date when NDVI reaches 25% of its amplitude of annual variation. For the  
37 other methods, MAD ranges from 6 to 17 days. GPP provides the most biased estimates.  
38 During the leaf senescence stage, NDVI- and CC-derived dates correlated significantly with  
39 observed dates ( $R^2 = 0.63$  and  $0.80$  for NDVI and CC, respectively), with MAD less than 7  
40 days. Our results show that proximal sensing methods can be used to derive robust  
41 phenological indexes. They can be used to retrieve long-term phenological series at flux  
42 measurement sites and help interpret the interannual variability and decadal trends of mass  
43 and energy exchanges.

44

45 **Keywords:** Phenology; deciduous forests; NDVI; RGB camera; PAR; GPP

46

47

48

49

50

51

52

53

54

55

56

57

58

59

60

61

62

63

64

65

66

67 **1. Introduction**

68 In the temperate and boreal climate zone, the timing of phenological events is strongly  
69 controlled by temperature and is thus responsive to the ongoing climate change (Menzel et al.  
70 2006; Badeck et al. 2004; Piao et al. 2019). The opening of buds (“budburst”) in spring and  
71 the coloration and fall of leaves (“leaf senescence”) in autumn are the key steps in the  
72 phenological cycle of forest trees. These stages mark the start and end of the  
73 photosynthetically active period and as such strongly influence the carbon and water  
74 exchanges between the ecosystem and the atmosphere (Goulden et al. 1996; Delpierre et al.  
75 2009a; Richardson et al. 2010; Dragoni et al. 2011). Historically, the timing of these events  
76 has been monitored through direct and periodic human-eye observations of the state of buds  
77 and leaves in the field (Sparks and Carey, 1995). However, this method is time-consuming,  
78 laborious and subject to an observer effect (Roetzer et al. 2000; Schaber and Badeck, 2002;  
79 Klosterman et al. 2014). Alternative, ground-based indirect methods have been tested for  
80 monitoring the phenology of different ecosystems. Proximal sensing methods based on  
81 measuring the radiation reflected, transmitted or absorbed by the canopy (henceforth  
82 ‘radiation-based methods’) are increasingly being used. Broad-band NDVI calculated from  
83 measurements of the fraction of reflected radiation in the Photosynthetically Active  
84 Radiation (PAR) spectral domain and shortwave bands, proposed by Huemmrich et al.  
85 (1999) has been successfully used in order to monitor vegetation phenology in many studies  
86 (Huemmrich et al. 1999; Richardson et al. 2007; Liu et al. 2019). Forest phenology was also  
87 described from measurements of the fraction of transmitted PAR through the canopy (Toda  
88 and Richardson, 2018; Perot et al. 2019) and Leaf Area Index (LAI) (Keenan et al. 2014).  
89 Spectral vegetation indices derived from tower-mounted hyperspectral spectroradiometers  
90 (Kobayashi et al. 2018; Lu et al. 2018), RGB/IR cameras (Richardson et al. 2007;  
91 Klosterman et al. 2014; Richardson, 2019) or from two bands red and near infrared proximal  
92 sensors (Ruy et al. 2010; Eklundh et al. 2011; Soudani et al. 2012; Hmimina et al. 2013) have  
93 also been assessed. More recently, passive sun-induced fluorescence has been used (Lu et al.  
94 2018). In vegetation sites where continuous measurements of carbon flux are available,  
95 phenology has also been estimated from the dynamics of GPP (gross primary productivity)

96 and net ecosystem exchange (NEE) (Gonsamo et al. 2013; Wu et al. 2017; Garrity et al.  
97 2011).

98 Over the past two decades, hundreds of experimental sites measuring CO<sub>2</sub>, water and  
99 energy exchanges between ecosystems and the atmosphere have been set up worldwide.  
100 These sites are organized in networks (Fluxnet, ICOS, etc.) and aim to record long-term data  
101 according to standardized protocols (Baldocchi et al. 2001; Franz et al. 2018). These sites  
102 acquire high temporal resolution time-series combining both mass (CO<sub>2</sub> and water) flux data  
103 with ancillary data which include incident, reflected and transmitted radiation measurements  
104 in different spectral ranges, and also LAI, NDVI, and RGB images of the canopy. Yet, the  
105 phenology of the vegetation cover is not routinely monitored over these sites, precluding the  
106 assessment of its influence on carbon and water exchanges. These sites provide data which  
107 allow the comparison of various radiation-based methods for monitoring forest phenology.  
108 However, the comparative studies cited above and those carried out at some of the carbon  
109 flux measurement sites did not cover all the methods on the same site and were also limited to  
110 a few and for short periods of time. Also, most of these studies suffered from a lack of direct  
111 and independent phenological observations. As underlined in Klosterman et al. (2014), this is  
112 a key challenge in interpreting estimates from the various approaches. Indeed, most of the  
113 radiation-based methods use optical signals at different wavelengths and at different spectral  
114 resolutions. Depending on species and sensor specifications (spectral, radiometric and  
115 geometric responses), this could lead to possible mismatches between observed and  
116 estimated phenology due to the well-known selective absorption properties of plant  
117 components (Sims and Gamon, 2002). The acquisition conditions (sun-view geometry, field  
118 of view) may also differ (Sonnentag et al. 2012). Also, some mainly observe the top of the  
119 canopy (down-looking sensors mounted above the canopy) while others are more integrative  
120 of the whole canopy (indirect methods that use transmitted or absorbed radiation). Therefore,  
121 there is a need to conduct comparative studies to establish rigorously the correspondence  
122 between phenological dates recorded by field phenologists and phenological metrics  
123 predicted by indirect proximal methods.

124 In this study, we present an exhaustive comparative survey of various proximal methods  
125 to estimate both spring and autumn phenology in a mature deciduous forest ecosystem  
126 surrounding the Fontainebleau-Barbeau carbon flux tower. The main objective is to evaluate  
127 the performance of each of the methods in reproducing inter-annual variation of spring and  
128 autumn phenology directly observed by field phenologists, over a 13-year period.

129

## 130 2. Materials and Methods

131

### 132 2.1. Site description

133 Data were mainly acquired in the Fontainebleau-Barbeau forest flux site (48°28'26"N.,  
134 2° 46'57" E.), 53 km southeast of Paris, France. Fontainebleau-Barbeau is a deciduous forest  
135 mainly composed of mature sessile oak (*Quercus petraea* (Matt.) Liebl), and an understory  
136 of hornbeam (*Carpinus betulus* L.). The average stand LAI, based on measurements using  
137 litter collection method over 2012-2018 period, is 5.8 m<sup>2</sup>/m<sup>2</sup>, ranging from 4.6 to 6.8 m<sup>2</sup>/m<sup>2</sup>  
138 (unpublished data). Hornbeam contribution to stand LAI accounts for 30%, ranging from  
139 24% to 39% from year to year.

140 In Fontainebleau-Barbeau, which belongs to the European ICOS-RI Ecosystem network  
141 (Integrated Carbon Observation System - Research Infrastructure, FR-Fon code), a 35-m  
142 high tower was installed in 2005 in order to measure energy and CO<sub>2</sub> exchanges between the  
143 forest and the atmosphere with the eddy-covariance technique. More details about the study  
144 site and flux calculation are given in Delpierre et al. (2016). The tower has been equipped  
145 with various proximal sensors that we used here to estimate the timings of phenological  
146 events (Table 1). More details about the instrumentation and measurements achieved in this  
147 site are available in [www.barbeau.universite-paris-saclay.fr](http://www.barbeau.universite-paris-saclay.fr).

148

149 **Table 1.** Methods and variables used in the calculation of phenology metrics in the  
150 Fontainebleau-Barbeau Forest. NDVI: narrow-band normalized difference vegetation index;  
151 NDVI<sub>br</sub>: broad-band NDVI;  $fR_{vis}$ : fraction of reflected radiation by the canopy in PAR  
152 spectral domain; GCC: greenness chromatic coordinate from RGB camera images;  $fAPAR$ :  
153 fraction of absorbed radiation in PAR spectral domain; CC: canopy closure; LAI: leaf area  
154 index; GPP: Gross Primary Productivity. These vegetation variables are named  $V_v$  hereafter.

155

| Method ( $V_v$ ) | Data used to calculate $V_v$ | Period | Time resolution |
|------------------|------------------------------|--------|-----------------|
|------------------|------------------------------|--------|-----------------|

| Human-eye phenological observations (OBS) | % open buds (spring)<br>% senescent (colored or fallen) leaves (autumn)                   | 2006-2018 (spring)<br>2011-2015; 2015-2017 (autumn)* | Twice a week (spring)<br>Once a week (autumn) |
|-------------------------------------------|-------------------------------------------------------------------------------------------|------------------------------------------------------|-----------------------------------------------|
| GCC index                                 | AXIS-Camera RGB images                                                                    | 2012-2018                                            | Hourly (8-17 h UT)                            |
| Narrow-band NDVI                          | Radiances in red and near infrared bands                                                  | 2006-2018                                            | Half hourly                                   |
| Broad-band NDVI <sub>br</sub>             | Incoming and reflected radiation in PAR and shortwave spectral regions                    | 2006-2018                                            | Half hourly                                   |
| $fR_{vis}$                                | Fraction of reflected radiation in PAR spectral region                                    | 2006-2018                                            | Half hourly                                   |
| Fraction of absorbed PAR (fAPAR)          | Incoming, reflected and below-canopy transmitted radiation in PAR spectral region         | 2006-2018                                            | Half hourly                                   |
| Canopy closure (CC)                       | Incoming and below-canopy transmitted radiation in PAR spectral region                    | 2006-2018                                            | Half hourly                                   |
| Leaf Area index (LAI)                     | Incoming and below-canopy transmitted radiation in PAR spectral region                    | 2006-2018                                            | Half hourly                                   |
| Gross Primary Productivity (GPP)          | Gross CO <sub>2</sub> assimilation by the ecosystem, calculated from eddy covariance data | 2006-2018                                            | Half hourly                                   |

156 \* see text for details

157

## 158 2.2. Extraction of phenological markers

159 Data and methods used in the calculation of phenology metrics are summarized in Table

160 1. The general principle of the phenological metrics extraction method consists in building

161 time-series at daily resolution that describe the canopy foliage dynamics during the whole

162 seasonal cycle of vegetation. This method applies to all the variables (“Vegetation variable”,

163  $V_V$ ) listed in (Table 1). Then, the extraction of the key phenological metrics is carried out

164 according to the methodology described in Soudani et al. (2008). In few words, an

165 asymmetric double sigmoidal function (ADS) was fitted on  $V_V$  time-series according to the

166 following equation:

$$167 \quad V_V(t) = (w_1 + w_2) + \frac{1}{2}(w_1 - w_2)[\tanh(w_3(t - u)) - \tanh(w_4(t - v))]$$

168 Eq.1

169  $V_V(t)$  is the considered vegetation variable (% of open buds and % of non-senescent leaves,

170 NDVI, NDVI<sub>br</sub>,  $fR_{vis}$ , fAPAR, CC, LAI, GCC or GPP).  $t$  is the time (day of year).  $\tanh$  is the

171 hyperbolic tangent and  $w_1$ ,  $w_2$ ,  $w_3$ ,  $w_4$ ,  $u$ ,  $v$  are the fitting parameters.  $(w_1 + w_2)$  is the  $V_V$

172 minimum in unleafy season.  $(w_1 - w_2)$  is the total amplitude of variation of  $V_V$  over the year.

173 The two phenological markers  $u$  and  $v$  are the dates of the two inflection points when  $V_V$

174 increases during the spring ( $u$ ) and decreases during the autumn ( $v$ ). For these two dates  $u$  and  
175  $v$ ,  $Vv(t)$  is at 50% of its total amplitude of variation, in spring and autumn respectively. Four  
176 other phenological markers are determined numerically from the extrema of the third  
177 derivative of the ADS function according to Zhang et al. (2003). The six phenological  
178 markers are named according to Klosterman et al. (2014) as follows: SOS, MOS and EOS for  
179 the start, middle, and end of leaf onset (budburst) in spring and SOF, MOF and EOF for the  
180 start, middle and end of leaf senescence in autumn, corresponding to 10%, 50% and 90% of  
181 total amplitude during the increase and the decline in canopy greenness in spring and autumn,  
182 respectively.

183 Fitting were done by minimizing the sum of squares of differences between fitted (Eq.1) and  
184 measured  $Vv$ . In order to better constrain the fitting at the end of the leafy season, each year of  
185 data was extended to the end of January of the following year. Thus, potentially, each  
186 time-series is composed of 396 days instead of 365 days.

187 Insert Figure 1:

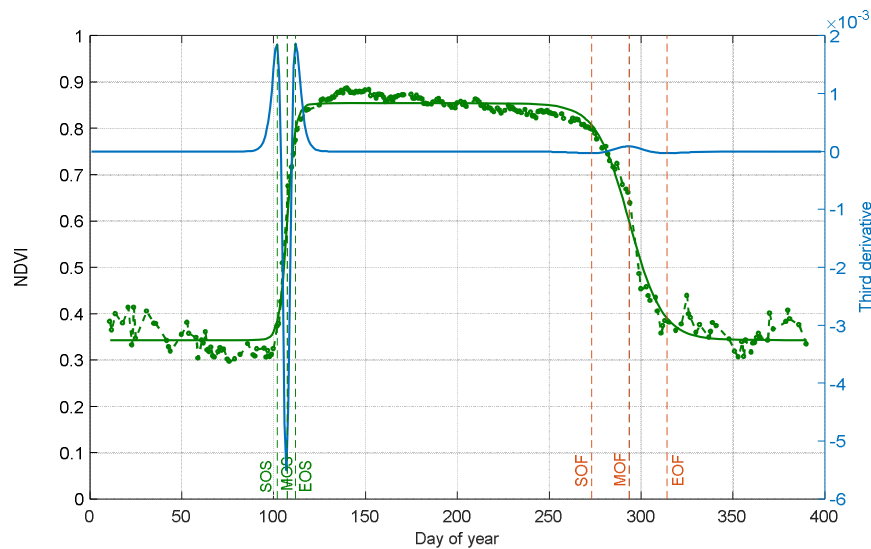

188  
189 Figure 1: Illustration of phenological markers extracted from ADS (Asymmetric double  
190 sigmoid) functions fitted to NDVI data acquired in 2015 (green square and green curve).  
191 Vertical lines: SOS, MOS and EOS are dates of start, middle and end of leaf onset in spring.  
192 SOF, MOF and EOF are dates of start, middle and end of leaf senescence (colored and fallen  
193 leaves) in autumn. The third derivative of the ADS function showing peaks and holes  
194 corresponding to the six phenological dates is in blue.

195

196 2.3. Data

197 2.3.1. Field phenological observations (OBS)

198 We collected spring and autumn phenological field observations at the  
199 Fontainebleau-Barbeau forest over 13 years (2006-2018; see Delpierre et al. 2020,  
200 Denéchère et al. 2019) through complementary sampling schemes. All over the 2006-2018  
201 period, we implemented an ‘extensive’ survey in which monitored bi-weekly over  
202 March-April the bud development of >100 randomly chosen dominant sessile oak trees, and  
203 recorded the date at which 50% of the individuals displayed at least 50% buds open in their  
204 crowns (corresponding to stage 7 of the BBCH scale). Observations were done with  
205 binoculars by three inter-calibrated observers. This date is referred to as BB-OBS (BB for  
206 budburst) in the following. In years 2015-2017 we complemented this protocol with an  
207 ‘intensive’ survey. Twenty-seven to 66 individual trees (depending on years) were tagged  
208 and monitored for bud burst from 0% budburst to 100% budburst in each tree crown. This  
209 survey yielded the progress of budburst for each tree crown, that we averaged to get the  
210 progress of budburst for the tree population (see Fig. 2a). We further monitored weekly the  
211 progress of leaf senescence (% of colored or fallen leaves) in each individual tree crown in  
212 autumn, and averaged the individual values to get the progress of leaf senescence at the tree  
213 population scale (see Fig. 2a). We fitted the ADS (eq. 1) function to these continuous data  
214 (Fig. 2a), and retrieved the MOS-OBS (in spring) and MOF-OBS (in autumn) metrics. The  
215 MOS-OBS (obtained from the intensive survey) and BB-OBS (obtained from the extensive  
216 survey) dates compare very well, their maximum absolute difference being 1-day (Delpierre  
217 et al. 2020). Hence in the following we will use the BB-OBS as the observed date of budburst  
218 over the whole (2006-2018) study period. All spring phenological observations were  
219 conducted on a bi-weekly basis. Hence the uncertainty of BB-OBS is 3.5 days.

220 We completed the MOF-OBS (autumn) metrics obtained at Fontainebleau-Barbeau  
221 through the intensive survey over 2015-2017 with leaf senescence data obtained over  
222 2011-2014 from a phenological survey site 50-km away from Fontainebleau-Barbeau (Orsay  
223 site). At this site, we deployed an intensive-monitoring protocol of leaf senescence (30 to 60



224 tagged sessile oaks monitored weekly for the percentage of colored or fallen leaves during  
225 autumn) from which we obtained the LS-OBS metrics, that is the date at which 50% trees had  
226 50% leaves colored or fallen. In 2015, autumn phenological observations were conducted  
227 simultaneously in Fontainebleau-Barbeau and Orsay: the MOF-OBS  
228 (Fontainebleau-Barbeau, DoY 300) and LS-OBS (Orsay, DoY 295) dates compared well.  
229 Considering that leaf senescence dates are comparable at a scale of tens of kilometres  
230 (Delpierre et al. 2009b), we used the 2011-2014 Orsay LS-OBS data to complement the  
231 2015-2017 Fontainebleau-Barbeau MOF-OBS data. All spring phenological observations  
232 were conducted on a weekly basis. Hence the uncertainty of MOF-OBS and LS-OBS is 7  
233 days.

### 234 2.3.2. Narrow-band NDVI

235 The NDVI is calculated as follows:

$$236 \quad NDVI = (NIR - R)/(NIR + R) \quad \text{Eq.2}$$

237  $R$  and  $NIR$  are radiances in the red (640-660 nm) and the near infrared (780-920 nm)  
238 bands, respectively. Radiances are measured using a laboratory made NDVI sensor  
239 (Pontailler et al. 2003). A description of this sensor and its use for estimating phenological  
240 metrics in various biomes is given in Soudani et al. (2012) and Hmimina et al. (2013).  
241 Briefly, the sensor is positioned at the top of the flux tower in Fontainebleau-Barbeau forest,  
242 about 7 m above the canopy, directed downwards and inclined about 20-30° to the vertical  
243 and facing south to avoid the hot-spot effects in canopy reflectance when the viewing  
244 direction is collinear with the solar direction. The field of view of the sensor was 100° and  
245 the area observed is a few tens of m<sup>2</sup>. Measurements are acquired continuously every  
246 half-hour. Noisy data, mainly due to rainfall and very low radiation conditions, were  
247 removed according the procedure described in Soudani et al. (2012). This procedure  
248 consists in keeping only NDVI measurements recorded when the ratio between global  
249 radiation ( $R_{Gin}$ ) measured above the canopy and the exo-atmospheric radiation ( $R_{ex}$ ) at the  
250 top of atmosphere exceeds the threshold of 0.6, considered to be the threshold for  
251 distinguishing between clear and overcast sky conditions (Soudani et al. 2012). Then, daily

252 average of filtered NDVI data acquired between 10h and 14h (UT) is considered to  
253 minimize the effects of daily variations in solar angle. Finally, filtered and daily averaged  
254 NDVI data were used in Eq.1.

### 255 2.3.3. RGB camera

256 Digital pictures (resolution of 2590 x 1920 pixels) of the forest canopy are acquired  
257 continuously every hour between 8h – 17h (UT) with an Axis P1347 camera installed next to  
258 and according to the same geometric configuration of the NDVI sensor. In order to minimize  
259 effects of changing illumination conditions, a white PVC panel is installed in the camera field  
260 of view (FOV) and used as a reference. Pictures (10/day) were processed automatically under  
261 MATLAB. At first, three regions of interest (ROI) were delineated on a spring picture. Two  
262 ROI, having an area of 3000 pixels and 1140 pixels, respectively, are located on the reference  
263 panel. The third ROI is located over the vegetation area that covers the central region of the  
264 picture (2 M pixels). To convert RGB data measured by the camera to pseudo-reflectance  
265 ( $\rho_R$ ,  $\rho_G$ ,  $\rho_B$ ), digital counts in Red, Green and Blue bands of the vegetation ROI were  
266 averaged and divided by the averages of R, G and B measured on the two white ROI on the  
267 reference PVC panel. These pseudo-reflectances were averaged on daily basis (10 values per  
268 day, corresponding to the hourly sampling) and used to determine daily Greenness  
269 Chromatic Coordinate (GCC) as follows:

$$270 \quad GCC = \rho_G / (\rho_R + \rho_G + \rho_B) \quad \text{Eq.3}$$

271 Phenological markers are then extracted from GCC time-series according Eq.1.

### 272 2.3.4. Broad-band NDVI<sub>br</sub> and fraction of reflected radiation $fR_{vis}$

273 Broad-band NDVI (NDVI<sub>br</sub>), named according to Huemmrich et al. (1999), was  
274 calculated from incoming and reflected radiation in the visible spectral region (400-700 nm)  
275 corresponding to the spectral range of PAR measured using PAR sensors (PQS1, Kipp and  
276 Zonen, Finland) and in the shortwave spectral regions (200 to 3600 nm) using a CMP22  
277 pyranometer (Kipp and Zonen, Finland). A conversion factor of 4.57  $\mu\text{mol J}^{-1}$  (from McCree,  
278 1972 in Wang et al. 2006) was used to convert PAR unit ( $\mu\text{mol m}^{-2} \text{s}^{-1}$ ) to energy unit ( $\text{J m}^{-2}$   
279  $\text{s}^{-1}$ ). As in Wohlfart et al. (2010), NDVI<sub>br</sub> is calculated as below:

280

$$281 \quad NDVI_{br} = \left( \left( \frac{NIR_{out}}{NIR_{in}} \right) - \left( \frac{PAR_{out}}{PAR_{in}} \right) \right) / \left( \left( \frac{NIR_{out}}{NIR_{in}} \right) + \left( \frac{PAR_{out}}{PAR_{in}} \right) \right) \quad Eq.4$$

282

$$283 \quad NIR_{in} = R_{Gin} - PAR_{in}$$

$$284 \quad NIR_{out} = R_{Gout} - PAR_{out}$$

285  $R_{Gin}$ ,  $R_{Gout}$ ,  $PAR_{in}$ ,  $PAR_{out}$  are incoming and outgoing reflected radiation in shortwave  
286 and PAR spectral regions.

287

288 The fraction of reflected radiation  $fR_{vis}$  was calculated as:

289

$$290 \quad fR_{vis} = \left( \frac{PAR_{out}}{PAR_{in}} \right) \quad Eq.5$$

291  $NDVI_{br}$  and  $fR_{vis}$  were filtered by applying the same ratio of 0.6 between  $R_{Gin}$  and  $R_{ex}$  and  
292 limiting the period of acquisition between 10h to 14h TU. Finally, filtered and daily averaged  
293  $fR_{vis}$  and  $NDVI_{br}$  data were used to in Eq.1 to extract the six phenological markers. Because  
294  $fR_{vis}$  is lower during the leafy season than in winter (unleafy season), Eq.1 was applied to (1-  
295  $fR_{vis}$ ) allowing to have the same temporal pattern as the other variables. For simplicity,  $fR_{vis}$   
296 term will be used hereafter when referring to the method.

### 297 2.3.5. Fraction of absorbed PAR $fAPAR$ , Canopy Closure $CC$ and Leaf Area Index $LAI$

298 Fifteen quantum PAR sensors (PQS1, Kipp and Zonen, Finland), directed towards the  
299 sky, are installed below canopy on the ground-area surrounding the flux tower to ensure a  
300 robust spatial sampling of the radiation transmitted through the canopy. Measurements are  
301 achieved at a half-hour time step, simultaneously with measurements of incoming and  
302 reflected PAR radiation above the canopy. The filtering of transmitted, reflected and  
303 incoming radiation measurements is carried out according to the same procedure used for  
304 NDVI,  $NDVI_{br}$  and  $fR_{vis}$ . Consequently, only measurements taken between 10h and 14h TU  
305 after filtering are used in the calculation of  $fAPAR$ ,  $CC$  and  $LAI$ .

306  $fAPAR$  is calculated according the following expression:

307

$$308 \quad fAPAR = \frac{PAR_{in} - PAR_{out} - PAR_t}{PAR_{in}} \quad Eq.6$$

309

310 Canopy closure  $CC$  is calculated using a new formulation as follows:

$$311 \quad CC = 1 - \left(\frac{PAR_t}{\cos(\theta)}\right) / PAR_{in} \quad \text{Eq.7}$$

312 Where  $PAR_{in}$  and  $PAR_{out}$  are defined above in Eq.3.  $PAR_t$  is the averaged over 15 sensors of  
313 transmitted radiation measured beneath the canopy.  $\theta$  is the sun zenith angle calculated  
314 using the standard astronomical formula. Unlike Eq. 6 and the previous studies (Richardson  
315 et al. 2007; Garrity et al. 2011; Toda and Richardson, 2018), the division of  $PAR_t$  by the  
316 cosine of the sun zenith angle (Eq. 7) allows to consider variation of  $PAR_t$  due solely to the  
317 variation of the path length of incident radiation passing through the forest canopy before  
318 reaching the ground according to the seasonal variation of the solar angle. In order to assess  
319 the performance of this new formulation proposed in this study, we also calculated  $CC$   
320 without cosine correction.

321 Another possible alternative to this correction/normalization in order to take into  
322 account sun angle effects on transmitted PAR (Eq. 7) is to estimate Leaf Area Index from the  
323 canopy gap fractions since the estimation of LAI using Beer-Lambert law corrects for the  
324 effects of solar angle and considers leaf angle distribution through the extinction coefficient  
325  $K$ . The LAI was calculated as follows:

326

$$327 \quad LAI = -\log(PAR_t / PAR_{in}) / K \quad \text{Eq.8}$$

328

329  $\log$  is the natural logarithm.  $K$  is the coefficient of extinction, calculated following the  
330 expression given in Campbell and Norman (1998):

331

$$332 \quad K(\theta) = \frac{\sqrt{x^2 + \tan(\theta)^2}}{x + 1.774(x + 1.182)^{-0.733}} \quad \text{Eq.9}$$

333

334 The parameter  $x$  describes an ellipsoidal leaf angle distribution function ( $x=1$  for  
335 spherical distribution,  $x > 1$  for planophile and  $x < 1$  for erectophile leaves). In this study and  
336 in order to let  $K$  vary according to the seasonal variations of the solar angle, we only fixed the  
337 parameter  $x$  in Eq.9. In order to estimate an average value of  $x$  parameter in the

338 Fontainebleau-Barbeau forest, Eq.8 was inverted, based on direct LAI measurements around  
339 the flux tower using litter collection technique according to the ICOS protocol (Gielen et al.  
340 2018) and the radiation measurements over 2012-2018 period.  $x$  was about 1.4 which  
341 corresponds to an average value of  $K$  of about 0.67 during the leafy season (DOY 150-240).  
342 This value agrees with previous studies (Baldocchi et al. 1984; Holst et al. 2004). Thus, we  
343 note that  $K$  is calibrated from the “true” average green LAI measured by the litter collection  
344 method, and thus it corrects for clumping effects and woody components. The term LAI is  
345 used in the present study instead of the term PAI (Plant Area Index, including leaf and  
346 woody components) usually used when it is estimated from canopy transmittance and using  
347 assumptions about leaf angle distribution in order to estimate the extinction coefficient  
348 (Campbell, 1986).

349 Similarly, to the other vegetation variables, phenological metrics were extracted  
350 from time-series of  $fAPAR$ ,  $CC$  and  $LAI$  according Eq.1.

#### 351 2.3.6. GPP data

352 Half-hourly GPP data were estimated on the ecosystem from net-carbon flux  
353 measurements acquired by an eddy covariance system. Details of instrumentation and  
354 processing are provided in Delpierre et al. (2016) and on  
355 [www.barbeau.universite-paris-saclay.fr](http://www.barbeau.universite-paris-saclay.fr). GPP was aggregated daily and used to create  
356 continuous time-series from 2006 to 2018. Extraction of phenological markers was done  
357 according the same procedure (using Eq.1).

358

#### 359 2.4. Statistical Analysis

360 The performance of each of the indirect methods presented above was evaluated with  
361 respect to the field phenological observations using three criteria which are (1) the coefficient  
362 of determination ( $R^2$ ) calculated from a simple linear regression between estimated ( $P_i$ ) and  
363 observed dates ( $O_i$ ) for the different years ( $N$ ), (2) the mean bias error (MBE) and (3) the  
364 mean absolute deviation (MAD) calculated as follows:

$$MBE = \frac{1}{N} \sum_{i=1}^N (P_i - O_i)$$

$$MAD = \frac{1}{N} \sum_{i=1}^N |P_i - O_i|$$

### 365 3. Results

366 An illustration of time-series of vegetation variables used (OBS, NDVI, NDVI<sub>br</sub>,  
 367 GCC, (1- $fR_{vis}$ ),  $fAPAR$ , CC, LAI and GPP) is provided in Figure 2. Time-series of all years  
 368 (2006-2018) are given in the *suppl. Fig.1*.

369

370 Insert Figure 2

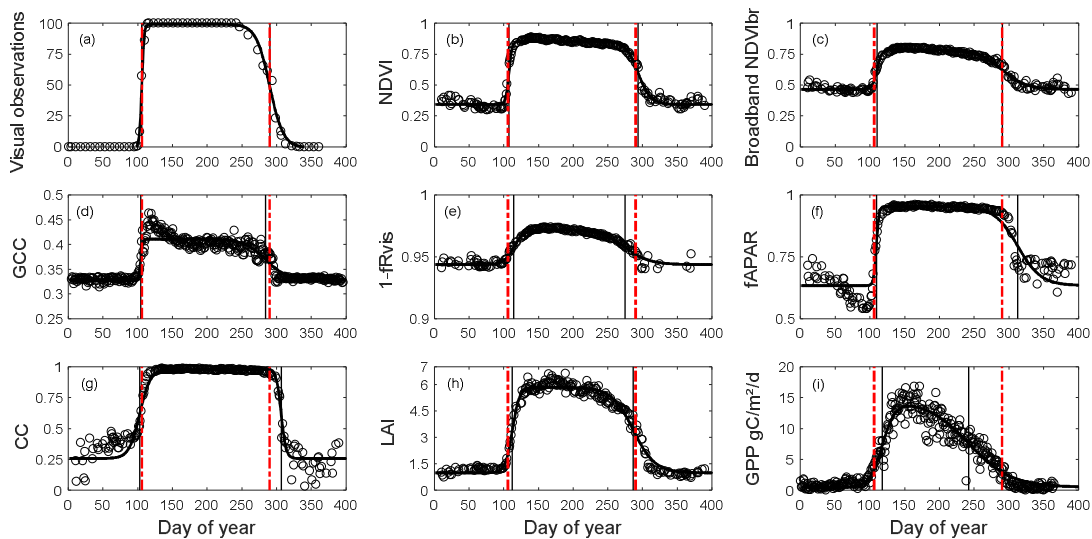

371

372

373 Figure 2: Illustration of one-year (2015) time-series of OBS (a), NDVI (b), NDVI<sub>br</sub> (c), GCC  
 374 (d), 1- $fR_{vis}$  (e),  $fAPAR$  (f), CC (g), LAI (h) and GPP (i) in Fontainebleau-Barbeau forest.

375 Data are shown in empty circle. The black bold continuous curve is the ADS function (Eq. 1)

376 fitted to time-series. For visual observations, data shown are in % of open buds in spring and

377 in % of non-senescent leaves (100% – observed percentage of senescent leaves) in autumn.

378 % of open buds is forced to 100% for the summer growing season and to 0% during the winter

379 dormancy season. Vertical lines: spring and autumn phenology estimates using MOS and

380 MOF (black) and observed dates (BB-OBS and LS-OBS) (red).

381 Time-series in Fig. 2 for the year 2015 and in the *suppl. Fig.1* for all years shows that

382 the general patterns of phenological transitions corresponding to the onset of leaves in the

383 spring and to leaf senescence in the autumn are reproduced by all indirect (i.e.

384 radiation-based and GPP) methods but with a variable bias in comparison with the field  
 385 observation. However, in the autumn, GPP time-series show a decline that appears very early  
 386 in the year, practically from the beginning of summer. GCC time-series may also show  
 387 untypical interannual patterns with some years where a GCC decline, although slower than  
 388 the one observed on GPP, is also observed very early in the year (2014, 2016-2018 in the  
 389 *suppl. Fig.1*).

390 Average phenological dates observed (DBB-OBS and LS-OBS) and estimated from  
 391 the different methods using MOS and MOF markers are given in Figure 3. All phenological  
 392 dates, using the six phenological markers (SOS, MOS, EOS, SOF, MOF, EOF), are given in  
 393 *the suppl. Table I*.

394  
 395 Insert Figure 3  
 396

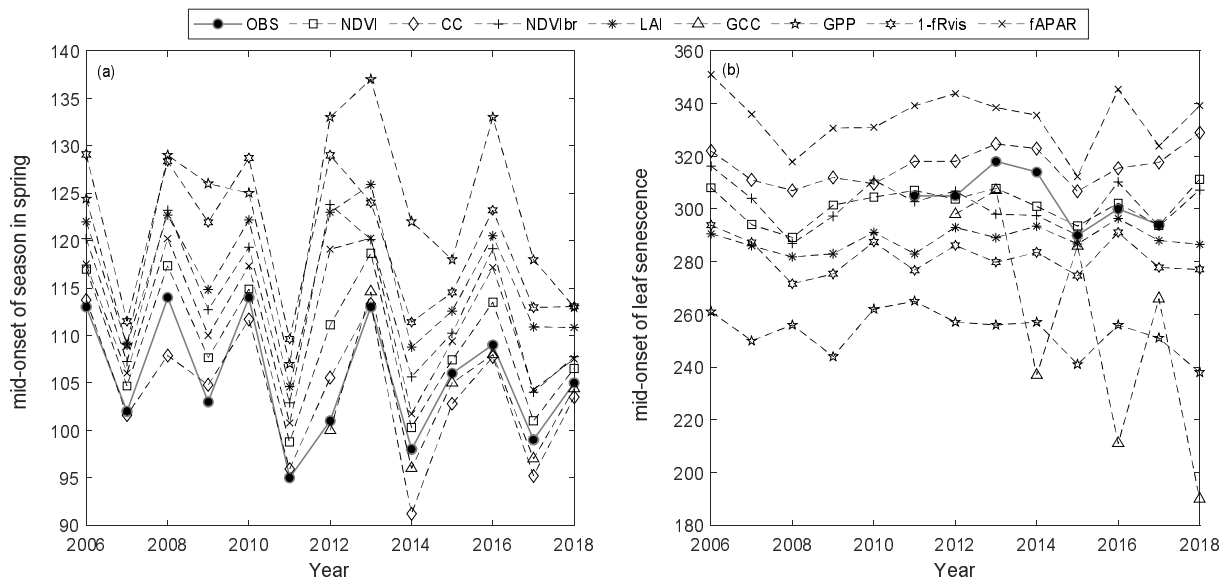

397

398 Figure 3: Average phenological dates in spring (a) and autumn (b) using MOS and MOF  
 399 phenological markers, respectively, and for the different years

400

401 In spring, field phenological observations (BB-OBS) are earlier than the estimates  
 402 provided by the majority of the indirect methods (Fig. 3a). However, whatever the method  
 403 used, the inter-annual phenological variations are well reproduced. During the autumn,  
 404 phenological observations (LS-OBS) are later than the indirect methods, except for CC and

405 *f*APAR (Fig. 3b), and the performance of the different methods seems more limited  
 406 compared to spring phenology. Figure 4 shows  $R^2$ , MBE and MAD between observed and  
 407 estimated phenological dates using MOS (Fig. 4a) and MOF (Fig. 4b) markers during spring  
 408 and autumnal phenological transitions, respectively.

409  
 410 Insert Figure 4  
 411

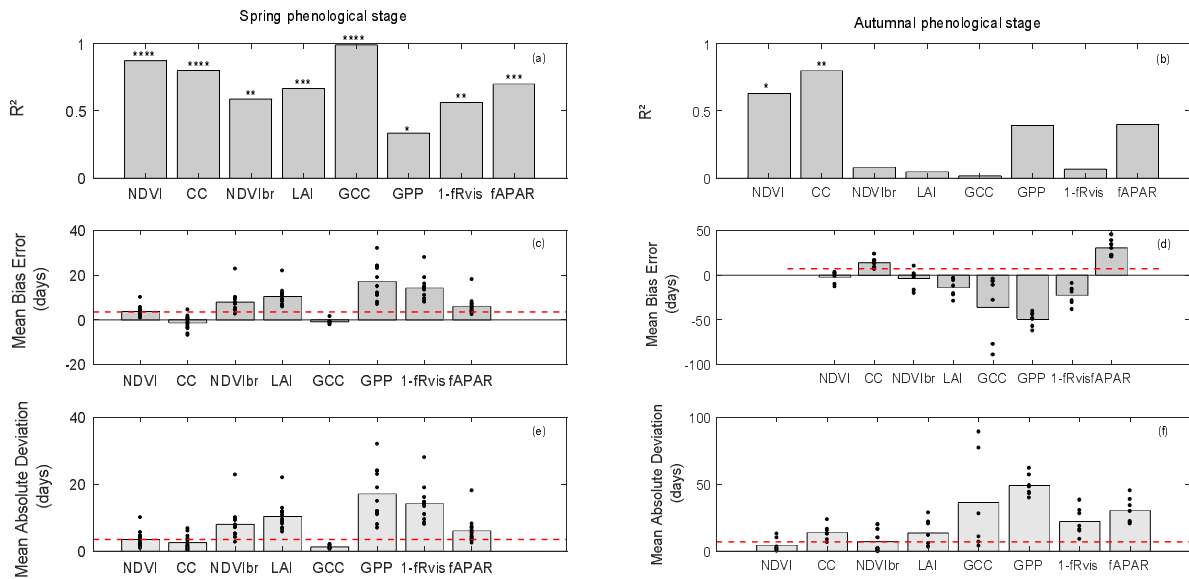

412

413 Figure 4: Coefficient of determination ( $R^2$ ) (a and b), mean bias error (MBE) (c and d) and  
 414 mean absolute deviation (MAD) (e and f) in days between observed and estimated  
 415 phenological dates using MOS and MOF markers during spring (a, c and e) and autumnal (b,  
 416 d and f) phenological stages. The significance levels of  $R^2$  are given by stars: \*  $P < 0.05$ , \*\*  $P$   
 417  $< 0.01$ , \*\*\*  $P < 0.001$  and \*\*\*\*  $P < 0.0001$ . The height of grey boxes marks the average of  
 418 the statistics across study years (individual years are represented by the black dots). Red  
 419 horizontal lines represent temporal-resolution related uncertainties associated with field  
 420 phenological observations of 3.5 days during the spring and of 7 days during the autumn.

421

422 In the spring,  $R^2$  values between observed (BB-OBS) and estimated phenological dates  
 423 (Fig. 4a) based on MOS marker are all statistically significant (at significance level of 0.05)  
 424 and range from about 0.99 to 0.34. All indirect methods are also consistent with each other as  
 425 shown by the high correlation coefficients in *the suppl. Fig.2*, which confirms the good



426 reproducibility of interannual phenological variability by the different indirect methods. In  
427 comparison to BB-OBS, the best correlation is found with GCC over the period 2012-2018  
428 where RGB images are available ( $R^2 = 0.99$ ). NDVI and CC are also highly correlated with  
429 BB-OBS ( $R^2 \sim 0.89$  and  $0.80$ , respectively). Lower but significant correlations are found  
430 between BB-OBS and  $fAPAR$ , LAI,  $NDVI_{br}$  and  $1-fR_{vis}$  ( $R^2$  between  $0.6$  and  $0.7$ ) and the  
431 lowest correlation is found between BB-OBS and GPP ( $R^2 \sim 0.34$ ).

432 Between the different indirect methods and during the spring,  $R^2$  between MOS  
433 estimates ranges from  $0.26$  to  $0.96$  (see correlation matrix in *the suppl. Fig.2*). Best  
434 correlations are found between  $fAPAR$  and NDVI,  $NDVI_{br}$ , LAI, and  $fR_{vis}$  ( $R^2 > 0.89$ ). Good  
435 correlations are also found between GCC, NDVI and CC ( $R^2 = 0.8$ ). Finally, we can also note  
436 good consistency between derived dates from GPP- and radiation-based methods ( $NDVI_{br}$ ,  
437  $fAPAR$ , LAI and  $fR_{vis}$ ;  $R^2 > 0.64$ ). The lowest correlation is found between GCC and GPP.

438 For budburst phenological timings, Mean Bias Error (MBE) between BB-OBS and MOS  
439 (Fig. 4c) is negative for GCC and CC (estimated date is earlier than observed date). MBE is  
440 about  $-1$  day with GCC (MAD  $\sim 1$  day) over 2012-2018 and is also about  $-1$  day with CC over  
441 2006-2018 (MAD  $\sim 2$  days). We note that MBE or MAD (Figs. 4c and 4e) for these two  
442 methods are slightly less than the observation uncertainty of  $3.5$  days. For the other methods  
443 (NDVI,  $NDVI_{br}$ , LAI,  $fR_{vis}$ ,  $fAPAR$  and GPP) MBE and MAD are equal, meaning that MOS  
444 estimates from these methods always overestimate the observed phenological dates  
445 BB-OBS. MBE (or MAD) is  $3.5$  days with NDVI,  $6$  days with  $fAPAR$  and  $8$  days with  
446  $NDVI_{br}$ . MBE is high with LAI ( $10$  days),  $fR_{vis}$  ( $14$  days) and GPP ( $17$  days). Note that for  
447 CC, MBE of about  $-1$  day was obtained after cosine correction of the transmitted PAR  
448 according to Eq. 7. Without this correction, MBE increases from  $-1$  day (MAD  $\sim 2$  days) to  $6$   
449 days (MAD  $\sim 6$  days) and  $R^2$  decreases from  $0.80$  to  $0.71$ . Comparison of the phenological  
450 patterns of CC time-series obtained with and without cosine correction shows that the cosine  
451 correction has the effect of causing an earlier spring phenological start, thus advancing the  
452 date of the inflection point (*the suppl. Fig.3*).

453 During the autumn (Fig. 4b), interannual variation of LS-OBS is well reproduced by  
454 CC and NDVI time-series which provide estimates that are significantly correlated with the

455 observations ( $R^2 = 0.80$  and  $0.63$  for CC and NDVI, respectively). Between the indirect  
456 methods (*the suppl. Fig.2*), best correlations are found between NDVI<sub>br</sub>, *f*APAR, NDVI and  
457 *fR<sub>vis</sub>* ( $R^2 \sim 0.7$ ), LAI and *fR<sub>vis</sub>* ( $R^2 = 0.58$ ), NDVI and *f*APAR ( $R^2 = 0.56$ ), NDVI and CC  
458 ( $R^2 = 0.55$ ), *fR<sub>vis</sub>* and *f*APAR ( $R^2 = 0.55$ ) and CC and *f*APAR ( $R^2 = 0.42$ ). Surprisingly,  
459 correlations between estimated dates from LAI and from CC during the autumn ( $R^2 = 0.1$ ),  
460 both using the fraction of the transmitted radiation as the unique input, are low compared to  
461 what might be expected. Note that it only concerns the senescence stage since the correlation  
462 between estimates from LAI and CC during the spring is high ( $R^2 \approx 0.74$ ).

463 During the senescence phase, for NDVI and CC methods for which the  $R^2$  between  
464 estimates and observations are significant, MBE is of about -2 days with NDVI (MAD  $\sim 5$   
465 days) and about 14 days with CC (MAD  $\sim 14$  days) (Fig. 4d and f). For CC, MBE decreases  
466 from about 37 days without cosine correction to 14 days after correction. The cosine  
467 correction yields a faster decrease in CC during the senescence stage (*the suppl. Fig.3*). For  
468 CC, LS-OBS are better predicted using thresholds at SOF instead of MOF with an MBE of  
469 about -1 day (and MAD of 7 days). MOF from LAI, *fR<sub>vis</sub>*, GCC and GPP provide early  
470 estimates compared to LS-OBS. MBE is of about -14 days with LAI, -23 days with *fR<sub>vis</sub>*, -36  
471 days with GCC and -50 days with GPP. *f*APAR leads to estimates that are on average about  
472 30 days later than LS-OBS. Note that for GCC, biases are highly variables between years.  
473 For years (2012/2013/2015) for which ADS function does not show the early decline in the  
474 autumn, estimated dates are very close to OBS (MBE  $\sim -7$  days).

475 For the phenological markers estimated at the beginning and end of budburst (SOS and  
476 EOS) or autumn (SOF and EOF) (see the *suppl. Table I*), and considering the period  
477 2015-2017 for which the six phenological markers are available from the intensive sampling,  
478 it can be noted that SOS dates are close to observed date (DOY 97) for all methods (between  
479 DOY 94-101) except for CC. CC starts to increase earlier, at DOY 82, i.e. 15 days before  
480 SOS from OBS.

481 Phenological field observations achieved for understory hornbeam trees over the period  
482 2006-2016 (data not shown), show that, on average, the hornbeam budburst date (i.e.  
483 BB-OBS for hornbeam) is around DoY 96 [range 85-107]. MBE between BB-OBS of

484 hornbeam and SOS estimates is about -1 days (MAD ~ 5 days) for GPP, -5 days (MAD ~ 5  
485 days) for NDVI, - 8 days (MAD 8 days) for CC and between 6-8 days for LAI, *f*APAR,  
486 NDVI<sub>br</sub> and *f*R<sub>vis</sub>. For GCC and over 2012-2016, MBE is of 2 days. Significant correlations  
487 were also obtained between observed hornbeam budburst dates and SOS estimates derived  
488 from NDVI, LAI, NDVI<sub>br</sub>, CC and *f*APAR. R<sup>2</sup> ranges between 0.73 and 0.49 and the best  
489 correlation is obtained with NDVI-based SOS estimates. Note also that there is a significant  
490 correlation between the observed budburst dates of oak and hornbeam (R<sup>2</sup> ~ 0.6) but on  
491 average hornbeam trees break buds about 10 days earlier than oaks.

492 For the end of spring, EOS based on GCC are quite close to EOS determined from field  
493 phenological observations (3 days earlier for GCC). For the other methods, estimated EOS  
494 are later than observed EOS dates. MBE are 3 days for NDVI, 8 days for *f*APAR, 10 days for  
495 CC, 14 days for NDVI<sub>br</sub>, 20 days for LAI, 28 days for *f*R<sub>vis</sub> and 41 days for GPP. During the  
496 senescence phase, SOF from NDVI and CC gives the best agreement with observed SOF date  
497 (3 days on average over 2015-2017), followed by *f*APAR (6 days). Observed EOF is better  
498 predicted using *f*R<sub>vis</sub>, CC, NDVI and GPP. MBE is about 3 days for *f*R<sub>vis</sub>, 6 days for CC and  
499 NDVI and 9 days for GPP.

500 As an illustration of the above, Fig. 5 shows average phenological patterns of vegetation  
501 variables derived from average parameters of modelled time-series through ADS function  
502 fitted to data over the period 2012-2017, common to all vegetation variables, for the spring  
503 (Fig. 5a) and the autumn (Fig. 5b) phenological stages, respectively. The correspondence  
504 between field observed dates and phenological metrics derived from indirect methods is also  
505 shown.

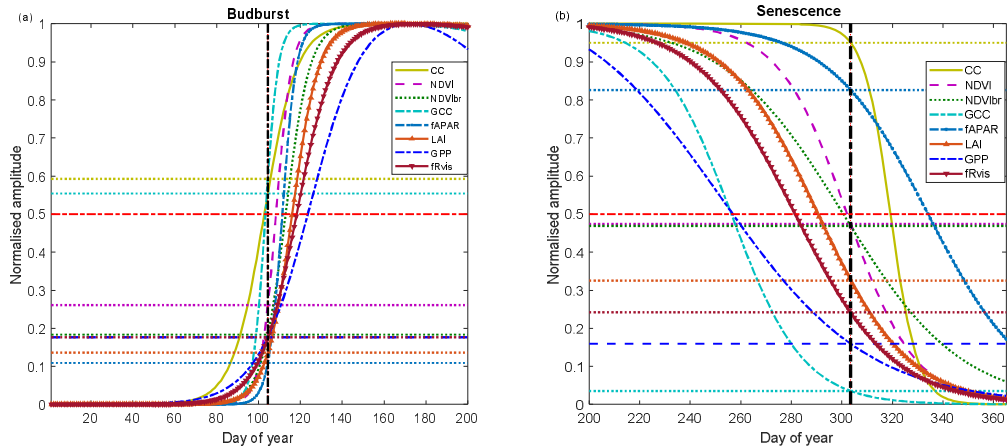

506

507 Figure 5: Average phenological patterns during budburst (a) and senescence (b) during the  
508 period 2012-2017 using modelled time-series through ADS function fitted on the measured  
509 time-series of NDVI (Normalized Difference Vegetation Index), GCC (Greenness  
510 Chromatic Coordinate), broad-band NDVI (NDVibr), LAI (Leaf Area Index),  $fAPAR$ , CC  
511 (Canopy Closure),  $fR_{vis}$  (fraction of reflected radiation) and GPP (Gross Primary Production).  
512 Amplitudes of variations are normalized to 1. Horizontal dotted lines: for each variable,  
513 proportion of the average amplitude that equals the average of the BB-OBS (Fig. 5a) and  
514 LS-OBS (Fig. 5b) dates. Horizontal bold red line ( $y$ -axis = 0.5): mid-amplitude (50%)  
515 corresponding to mid-onset of spring (MOS) and mid-onset of senescence (MOF). Vertical  
516 black line: averages of observed phenological dates during 2012-2017 for budburst  
517 (BB-OBS) and for senescence (LS-OBS).

518

519 Figure 5 illustrates what is described above by showing average temporal patterns during  
520 budburst and senescence over the period 2012-2017, common to all eight methods and for  
521 which field phenological observations are available in both spring and autumn. Figure 5a  
522 shows the good correspondence between the observed dates and the estimates derived from  
523 CC and GCC using the mid-amplitude (50%) MOS threshold. For CC and GCC, MOS  
524 clearly marks the budburst date as characterized in the field using the observation protocol  
525 used in our study (50% of trees with at least 50% open buds per tree crown, BB-OBS). For  
526 the NDVI-based method, on average, the mean observed BB-OBS date coincides with the  
527 date when NDVI reaches 25% of its amplitude of variation between NDVI minimum in

528 winter and NDVI maximum at the end of spring. For the other methods including  $fAPAR$ ,  
529  $NDVI_{br}$ , LAI,  $fR_{vis}$  and GPP, estimated dates at mid-amplitude threshold are later than  
530 BB-OBS with a MAD ranging from 6 to 17 days. A threshold at 20% of the spring amplitude  
531 for GPP,  $fR_{vis}$ ,  $NDVI_{br}$  and at 10% for LAI and  $fAPAR$  provide estimates with a bias < 2  
532 days. During the leaf senescence phase (Fig. 5b), NDVI at mid-amplitude and CC time-series,  
533 just at the start of its decline (~ 95% of its amplitude) provide estimates consistent with the  
534 observations. For the other methods, the thresholds shown in Figure 5b are only valid on  
535 average over the period 2012-2017 since the relationships between observations and  
536 estimates are not statistically significant as shown in Fig. 4b.

537 Figures 5a and 5b also shows that the different methods perform relatively well in the  
538 spring but deviate from each other in the autumn. The *supplementary material Fig.4* shows  
539 that the relationships between the different variables are dependent on the considered  
540 phenological stage. This is clearly the case in the relationships between  $fAPAR$  and NDVI,  
541 GCC, GPP,  $1-fR_{vis}$ . It can be noted that a same NDVI value corresponds to a lower  $fAPAR$  in  
542 spring than in autumn. In other words, NDVI and  $fAPAR$  responses to changes in canopy  
543 properties follow two different trajectories depending on the season. This “hysteresis”  
544 phenomenon may explain the shift between NDVI and  $fAPAR$ -based estimates during the  
545 senescence phase (overestimation of the senescence date by the  $fAPAR$ ) while both predict  
546 very close dates during the spring. This phenomenon of “hysteresis” is also observed in the  
547 same way between  $fAPAR$  and GCC or  $fAPAR$  and GPP. A given GPP or GCC value  
548 corresponds to a lower  $fAPAR$  in spring than in autumn. We can also note that the  
549 relationships between NDVI and GCC are different depending on the season, but for the  
550 same NDVI corresponds a higher GCC in spring than in autumn.

551

## 552 **4. Discussion**

553

### 554 4.1. Ability of GCC to detect phenological transitions

555 Using RGB-based GCC (Greenness Chromatic Coordinate index) time-series, the mean  
556 absolute deviation (MAD) with BB-OBS is about 1 day over the 7 years of comparison  
557 (2012-2018). This result is in line with previous studies, particularly the study of Richardson

558 et al. (2018) who compared RGB-camera based estimates to independent human-eye  
559 observations achieved over four deciduous forests. They observed average biases ranging  
560 from 1.5 to 6.5 days depending on the site and the best agreement was obtained using GCC at  
561 25% of its amplitude as threshold. Many other studies comparing GCC and indirect visual  
562 phenological estimates from same photographs (Klosterman et al. 2014, Wingate et al. 2015)  
563 have also concluded that GCC method yields estimations of the spring phenological date  
564 with an average bias around 7-8 days. In our study, we show that over the 7-year period (Fig.  
565 5a), GCC at the inflection point (MOS) in spring which corresponds to 50% of its annual  
566 amplitude derived from modelled time-series is the best predictor of the human-eye observed  
567 BB-OBS dates which correspond to 50% of sampled oak trees having at least 50% open buds  
568 (in fact corresponding to about 50% open buds at the population scale, N. Delpierre  
569 unpublished results). This result supports the fact that the camera accurately reports what is  
570 observed by human-eye in the field during the spring and that GCC index is a very good  
571 indicator of the timing of budburst. It can also be noted that the phenological field  
572 observations have been carried out by the same (three) intercalibrated observers over the  
573 study period and according to a constant protocol. This may also participate in explaining the  
574 good agreement between field observations and estimated dates from RGB-based GCC index  
575 time-series. Indeed, several studies have highlighted the importance of uncertainties  
576 associated with observations due to various sources, especially observer effect (Schaber,  
577 2002) and the availability of good quality data is a prerequisite for a rigorous evaluation of  
578 the various indirect methods.

579 On the other hand, the ability of GCC to estimate the senescence date is variable. For  
580 some years, the decline in GCC may start earlier than expected, and therefore estimated dates  
581 are strongly biased. When the senescence phase causes pronounced contrasts on RGB images  
582 between the summer growth and senescence phases, estimated dates agree with field  
583 observations, as for the years 2012, 2013 and 2015. For these years, estimated dates are very  
584 close to OBS with MAD of about 7 days, of the same order of magnitude as the field  
585 observation uncertainty. Therefore, during autumn, data quality and data processing appear  
586 crucial to obtain reliable estimates, and extracting of senescence dates based on ADS model

587 may not be the right approach. Other RGB-based spectral indices using the red band,  
588 designed specifically to monitor the autumn phenological transition, such as RCC (red  
589 chromatic coordinate) (Klosterman et al., 2014; Liu et al. 2020) or GRVI (Green-Red  
590 Vegetation Index) (Motohka et al. 2010; Nagai et al. 2012) should also be evaluated. This is  
591 beyond the scope of this study and further methodological development is therefore needed  
592 to assess rigorously the real potential of this technique for estimating phenological dates  
593 during the senescence stage.

594 Another point to note, as shown in this study (Fig. 2d) and previously pointed in several  
595 other studies (Sonntag et al. 2012; Keenan et al. 2014; Klosterman et al. 2014; Petach et al.  
596 2014) is that GCC shows annual spikes during the spring followed by a rapid decline. The  
597 annual amplitude of GCC determined from the modelled time-series is generally smaller than  
598 the actual amplitude. In our study, GCC spikes are reached on day 121 on average over  
599 2012-2018. They are not well captured by ADS model because they are delayed by about 10  
600 days compared to the end of spring green-up stage determined from GCC-based EOS (end of  
601 spring season) phenological marker. GCC spikes are also reached 10 days before LAI  
602 reaches its maximum. This result is consistent with Keenan et al. (2014). Based on intensive  
603 field measurements at canopy and leaf scales, they observed a time lag of about two weeks  
604 between the canopy maximum LAI measured by LAI-2000 Plant Canopy Analyzer and GCC  
605 spikes. They concluded that GCC depends on leaf color and saturates faster than measured  
606 canopy LAI, that was explained by the oblique viewing angle of the camera which leads to a  
607 higher effective LAI. In the same study, they showed that GCC peaks were reached while  
608 main leaf traits (maximum leaf area, chlorophyll content, leaf mass area) continue their  
609 development. Similar results were also reported in Yang et al. (2014) and Liu et al. (2015)  
610 who showed that GCC peaks in spring were approximately 20 days earlier than the peak of  
611 the total chlorophyll concentration. In our study, on average, GCC spikes almost coincide  
612 with maximum  $fAPAR$  and CC (EOS) whereas these two variables are based on incoming,  
613 reflected and transmitted PAR measurements using hemispherical sensors and therefore are  
614 integrative of the whole canopy. This result supports the hypothesis of a combined effect of  
615 canopy coloring and closure on GCC spikes. However, and contrary to LAI, which is

616 estimated, in this study, only from incident and transmitted radiation, *f*APAR and CC also  
617 additionally use reflected radiation. Therefore, they are also sensitive to changes of leaf color  
618 and other leaf traits during the spring. This may explain the good correspondence between  
619 the timings of GCC spikes and the timings of maximum of *f*APAR and CC.

620

#### 621 4.2. Ability of NDVI to detect phenological transitions

622 Results also show that MOS and MOF of NDVI are good proxies of observed dates with  
623 MAD of about 3-4 days in spring over the whole period 2006-2018 and 5 days in autumn  
624 over 2011-2017 period. Estimates based on NDVI are also highly correlated with spring and  
625 autumn field phenological observations with an  $R^2$  of 0.88 and of 0.62, respectively. This  
626 reflects the ability of ground-based NDVI time-series to reproduce the interannual variability  
627 of phenology at this site (Figs. 3b and 4b). This potential has also been shown in previous  
628 studies, in evergreen and deciduous forest ecosystems in France, an evergreen tropical rain  
629 forest in French Guyana, an herbaceous savanna in Congo and a succession of three annual  
630 crops in Belgium (Soudani et al. 2012; Hmimina et al. 2013).

631 Good agreement between RGB-camera indices and proximal NDVI-based  
632 measurements has also been shown in crops (Sakamoto et al. 2012) and in herbaceous  
633 species (Anderson et al. 2016). However, NDVI measurements does not show the spikes  
634 observed on GCC in late spring and our study shows that NDVI is more stable, less scattered  
635 and better representative of LAI plateau throughout the summer growth phase observed in  
636 deciduous forests. Similar conclusions were drawn in Petach et al. (2014). In conclusion, the  
637 NDVI sensor using MOS and MOF criteria can be considered as the best option since it  
638 provides reliable estimates for monitoring both spring and autumn phenology. In addition,  
639 and as highlighted in Hmimina et al. (2013), *in situ* NDVI measurements using proximal  
640 sensors are done a few meters above the top of canopy, and because NDVI is a normalized  
641 index, the effects of the sky conditions produce little noise. Thus, measurements can be  
642 carried out under diffuse sky conditions, allowing for the monitoring of vegetation  
643 phenology at high temporal frequency. Nevertheless, proximal NDVI sensors have the  
644 disadvantage that measurements remain limited to a narrow field of view and do not allow to



645 extract key phenological metrics at the individual tree level when it may be possible using  
646 RGB camera (Delpierre et al. 2020). The use of multispectral cameras with RGB+NIR  
647 bands, which are increasingly used on many sites, may allow to overcome this inconvenience  
648 and should therefore be encouraged.

649

#### 650 4.3. Ability of CC to detect phenological transitions

651 During the spring, good performance of CC-based method was obtained after cosine  
652 correction of the transmitted PAR according to Eq. 7 (Fig. 4a and the *suppl. Table I*). Without  
653 this correction, MAD between estimated and observed MOS dates is three times larger (6  
654 days vs 2 days) and  $R^2$  slightly lower (0.71 vs 0.80). It can be noted that uncorrected CC,  
655 which corresponds to the complement to 1 of the canopy transmittance, and  $fAPAR$  provide  
656 similar estimated MOS dates, that are on average about one week later than observed dates  
657 (the *suppl. Table I*). This result is in line with the study of Perot et al. (2020), conducted in a  
658 mature oak forest, which showed that on average estimated MOS dates from canopy  
659 transmittance time-series are about 7 days later than the observed budburst dates.

660 Comparison of the phenological patterns of CC time-series obtained with and without  
661 cosine correction (the *suppl. Fig.3*) shows that the cosine correction has the effect of causing  
662 an earlier spring phenological start, thus advancing the date of the inflection point. While the  
663 estimated date at the inflection point after cosine correction (CC-MOS) is very close to  
664 BB-OBS, the spring start date (SOS) appears earlier than the observed SOS of oak trees. This  
665 can be explained by the budburst of the first trees of the hornbeam understory, which on  
666 average has an earlier budburst date, about 10 days before the overstory oak trees. During the  
667 senescence phase, the cosine correction significantly improved the estimates, but the bias  
668 remains high (14 days on average). Despite this bias, autumn CC-MOF dates are the most  
669 correlated with observations LS-OBS ( $R^2 = 0.8$ ) (Fig. 4b and the *suppl. Table I*). We notice  
670 that CC time-series are sensitive to the intercepted radiation, which mostly depends on  
671 canopy structure, and not so much on pigmental (color) properties. Here we derived LS-OBS  
672 from the monitoring of the percent of senescent (i.e. colored or fallen leaves) in the canopy,  
673 which we build from independent observations of percent colored and percent fallen leaves

674 in the tree crowns. For those years when we continued canopy observations until complete  
675 leaf fall, we observed that 50% leaf-fall is typically attained 2-3 weeks after 50%-senescence,  
676 at a date comparable to CC-MOF.

677 In summary, the cosine correction significantly improves estimated dates based on CC  
678 both in the spring and senescence seasons. The new formulation of CC calculation proposed  
679 in this study (Eq.7), that takes into account the effects of seasonal variations in sun angle on  
680 the transmitted PAR, merits being tested at other sites in order to assess accurately its  
681 performance as it is likely to be dependent on both the canopy structure and the latitude of the  
682 site.

683

#### 684 4.4. Ability of NDVI<sub>br</sub> to detect phenological transitions

685 The phenological pattern of NDVI<sub>br</sub> is comparable to the one obtained from NDVI  
686 time-series but with greater amplitudes during the spring and autumn phenological  
687 transitions for the latter (Fig. 2 and the *suppl. Fig.1*). This result is also consistent with Liu et  
688 al. (2019) who compared broadband and narrowband NDVI in a temperate broadleaved  
689 deciduous forest. Like NDVI, NDVI<sub>br</sub> is measured directly above the canopy and seems to  
690 be not very sensitive to cloud conditions as also underlined in Wang et al. (2004) and Wilson  
691 and Meyers (2007). On average, the deviation between estimated MOS dates from NDVI and  
692 NDVI<sub>br</sub> are 5 days in spring and 1 day in autumn, respectively. However, while in spring the  
693 estimated MOS dates from NDVI and NDVI<sub>br</sub> are highly correlated ( $R^2 = 0.87$ ), the  
694 correlation is lower in autumn ( $R^2=0.49$ ) and is non-significant between autumn NDVI<sub>br</sub>  
695 estimates and observed dates LS-OBS. As a result, NDVI and NDVI<sub>br</sub> seem to be  
696 decorrelated in autumn and the performance of NDVI<sub>br</sub> time-series to describe the  
697 interannual variability of phenology is only limited to spring.

698

#### 699 4.5. Ability of GPP to detect phenological transitions

700 On average over an 11-year period (2006-2016), GPP starts its increase (GPP-SOS) on  
701 DoY 96, 10 days earlier than overstory oak trees (DoY 106, Fig. 3 and the *suppl. Table I*).  
702 The starting date of GPP coincides exactly with the date of hornbeam budburst (DoY 96) and  
703 of the earliest oaks (Delpierre et al. 2020). However, GPP reaches its maximum in a time

704 interval close to the summer solstice (Figs. 2 and 5a) and then starts to decline immediately  
705 after. Consequently, GPP-MOS overestimates BB-OBS by about 17 days. This result is in  
706 line with other previous studies that showed that GPP peaks several weeks later than the  
707 peaks reached by other variables. Toomey et al. (2015) showed that the start of GPP in spring  
708 coincides with the onset of GCC, but GPP peaks 2-4 weeks later. They also noted an  
709 immediate decline of GPP once its peak is reached. Similar conclusions between GCC and  
710 GPP can also be drawn from Richardson et al. (2009).

711 During the autumn phase, the GPP fails to produce plausible estimates of LS-OBS,  
712 either using SOF, MOF or EOF criteria.

713 As underlined above, among all the indirect methods evaluated in this study, estimates of  
714 budburst dates derived from GPP time-series using the MOS criterion are the most biased  
715 estimates and are also the least correlated with the observed phenological dates of oak trees  
716 (MBE 17 days,  $R^2 = 0.34$ , Fig. 4a). This weak correlation can be explained both by a starting  
717 of the GPP simultaneously with the budburst of the hornbeam understory and the high  
718 dependency of GPP, in addition to the effects of the increase of the LAI and the leaf  
719 maturation, to the solar radiation level (Delpierre et al. 2009a). Figs. 2 and 5a show that GPP  
720 reaches a short-lived plateau around the summer solstice in June, when both maximum LAI  
721 is reached, and solar irradiance is at its maximum. On the other hand, MOF dates during the  
722 autumn are earlier than LS-OBS (Figs. 2, 5 and the *suppl. Table I*). Consequently, the length  
723 of the period of budburst and leaf development in spring between GPP-derived SOS and EOS  
724 dates, is about 57 days over the 13 years of measurements, while it is only about 17 days from  
725 *in situ* NDVI. The length of the growing season, between estimated dates of MOS and MOF,  
726 is also greatly reduced and it is only 130 days based on GPP, whereas it is 192 days from  
727 NDVI and 199 days from field phenological observations. Similar results are shown in the  
728 studies of Lu et al. (2018) and Keenan et al. (2014). In conclusion, the extraction of  
729 phenology from GPP time-series using inflection points of transitions in the spring and  
730 autumn are therefore not representative of the canopy leaf display and other approaches  
731 based on absolute or relative thresholds of GPP as in Richardson et al. (2010) and in Wu et al.  
732 (2017) may be more representative. Nevertheless, GPP remains a composite signal driven by

733 changes in vegetation phenology and physiological processes that are under the control of the  
734 fluctuations of abiotic factors and its use to derive the timings of phenological events must be  
735 carried out with great care, as strongly emphasized in Gonsamo et al. (2013).

736

737 4.6. Hysteresis phenomena between vegetation variables according to the spring and  
738 senescence seasons

739 As shown in Fig. 5, the performance of the different methods for estimating key  
740 phenological dates differs between spring and autumn. While the correlations between  
741 estimates and observations are all significant during spring (Fig. 4a), only NDVI and CC  
742 provide estimates consistent with autumn observations (Fig. 4b). The hysteresis phenomenon  
743 that characterizes some relationships between the vegetation variables used in the different  
744 methods reflects their different biophysical meanings (the *suppl. Fig.4*). This is particularly  
745 the case for the relationships between NDVI and  $fAPAR$  and between GCC and  $fAPAR$ . In  
746 spring, the performances of NDVI and  $fAPAR$  are similar, whereas in autumn the  $fPAR$   
747 provides very late estimates. This can be explained by a high sensitivity of NDVI or GCC to  
748 pigment changes during senescence whereas  $fAPAR$  responds mainly to leaf fall and canopy  
749 opening.

750

751 4.7. Linking phenological dates recorded by field phenologists and phenological metrics  
752 predicted by indirect proximal methods

753 The analysis of the link between phenological dates based on field observation and those  
754 derived from modelled time-series (Figs. 5a and 5b) shows that, on average over 13 years,  
755 BB-OBS (corresponding approximately to 50% buds open in the canopy) are better predicted  
756 by MOS (50% of the annual amplitude of variation) for methods based on GCC and CC. For  
757 NDVI-based method, a threshold of 25% of its amplitude coincides with the average  
758 observed date. However, due to the rapid increase of NDVI during the spring, a 50%  
759 threshold also provides estimates with a bias of the same order of magnitude as the  
760 uncertainty in the phenological observations (3.5 days). For the other methods ( $GPP$ ,  $fR_{vis}$ ,  
761  $NDVI_{br}$ ,  $fAPAR$  and LAI), a threshold at 20% of the annual amplitude appears more  
762 appropriate to estimate the average observed date of budburst. During the senescence phase,

763 and for NDVI- and CC-based methods, for which observations and estimates are  
764 significantly correlated, MOF of NDVI is very close to the observed LS-OBS date (50% of  
765 trees having at least 50% of senescent or fallen leaves per tree crown) and SOF of CC is more  
766 in line with the observed date but less stable than MOF.

767 Although they are based on data acquired over a long period covering 13 years of  
768 measurements and observations, these thresholds may be specific to our study site and their  
769 stability and genericity merit further study in other forest ecosystems.

770

771 4.8. Summary remarks on deriving phenological metrics from radiation-based methods in  
772 carbon flux-tower sites

773 Many carbon flux-tower sites that use the eddy covariance technique routinely acquire  
774 the biometeorological variables used in the calculation of GPP, LAI,  $fR_{vis}$ ,  $NDVI_{br}$ ,  $fAPAR$   
775 and CC. During the spring stage, LAI,  $fR_{vis}$  and GPP-based estimates are biased by about 10  
776 to 17 days.  $fR_{vis}$  and GPP are the worst performing predictors, especially GPP. On the other  
777 hand, this study shows that  $NDVI_{br}$ ,  $fAPAR$  and CC are able to reproduce interannual  
778 variation of spring budburst with a bias about one week when MOS is considered (Figs. 3 and  
779 4, the *suppl. Table I*). In same vein, the use of CC based-method is also another robust  
780 alternative for monitoring spring and autumn phenological transitions in carbon flux-tower  
781 sites. However, CC of  $fAPAR$  require additional measurements of transmitted radiation  
782 below the canopy. Indeed, such measurements are not commonly achieved at carbon flux  
783 measurement sites and should be deployed as, in addition to phenology, transmitted radiation  
784 data time-series can also be used to estimate Leaf Area Index and to characterize its seasonal  
785 dynamics (Keenan et al. 2014). These measurements must be performed using an appropriate  
786 number of below-canopy radiation sensors to take the heterogeneity of the canopy structure  
787 into account (Ponzailler, 1990; Link et al. 2004; Garrity et al. 2011; Webster et al. 2016).  
788 When such data are available, derived phenological metrics can be used to conduct  
789 retrospective studies in order to interpret the interannual variability of carbon fluxes and are  
790 preferable to those derived from the fluxes themselves such GPP or NEP, as already pointed  
791 in Gonsamo et al. (2013).

792

## 5. Conclusion

793

794

795

796

797

798

799

800

801

802

803

804

805

806

807

808

809

810

811

812

813

814

815

816

We used various methods to characterize the temporal dynamics of forest canopy in a temperate deciduous forest. Field phenological observations provided exhaustive multi-year samples allowing to accurately assess the potential of each method. Results show that this potential is different depending on the method and the season. During the spring phase, GCC, NDVI and CC, using the inflection point MOS criterion, provide estimates closest to observed dates with an absolute bias less than 4 days, of the same order as the temporal resolution of phenological observations (3.5 days). For CC, this is obtained only after a cosine correction of the transmitted PAR, correction that takes the variation of the optical path in the canopy due to the seasonal variation of the solar angle into account. Without this correction, the prediction bias increases from about 2 days to 6 days. Using MOS criterion, NDVI<sub>br</sub> and *f*APAR give also satisfactory estimates with a bias around one week that corresponds to the temporal resolution generally used in phenological observations. However, for these variables as well as for *f*R<sub>vis</sub>, LAI and GPP, a threshold of 20% of their transition amplitude in spring allows to obtain more precise estimates in agreement with observed dates. During the senescence phase, only MOF of NDVI and CC can reproduce the interannual variability of leaf senescence.

This study validated the estimates provided by the different methods by comparing them with phenological observations carried out according the same protocol by intercalibrated observers and over 13 years of field observations for budburst and 7 years for leaf senescence. But more particularly, this study demonstrated the good performance of methods based on broad band NDVI (NDVI<sub>br</sub>), the fraction of absorbed PAR (*f*APAR) and canopy closure (CC) that use solar radiation data routinely recorded at several flux tower sites. This opens real perspectives to conduct retrospective studies for a better interpretation of the interannual variation of carbon fluxes. *f*APAR and CC use transmitted radiation

817 measurements below the canopy which are less common but merit being largely deployed at  
818 flux measurement sites.

819

## 820 **Acknowledgments:**

821 Many thanks to all colleagues who participated in the installation of the various  
822 instruments on the Fontainebleau-Barbeau site, and all those involved in the data collection  
823 used in this study. The FR-Fon study site has been funded through several French and  
824 European research framework programmes (GIP Ecofor, Allenvi, CarboEurope, FP6;  
825 CarboExtreme, FP7). It is part of the Integrated Carbon Observation System (ICOS, FP7)  
826 European research infrastructure, and of the SOERE-Ecofor French research network.

## 827 **References**

- 828 Ahrends, H. E., Brügger, R., Stöckli, R., Schenk, J., Michna, P., Jeanneret, F., Wanner,  
829 H., Eugster, W. 2008. Quantitative phenological observations of a mixed beech forest in  
830 northern Switzerland with digital photography. *J. Geophys. Res. Biogeosci.* 113:G04004.  
831 <https://doi.org/10.1029/2007JG000650>
- 832 Anderson, H.B., Nilsen, L., Tømmervik, H., Karlsen, S.R., Nagai, S., Cooper, E.J. 2016.  
833 Using Ordinary Digital Cameras in Place of Near-Infrared Sensors to Derive Vegetation  
834 Indices for Phenology Studies of High Arctic Vegetation. *Remote Sens.* 2016, 8(10),  
835 847. <https://doi.org/10.3390/rs8100847>
- 836 Badeck, F.W., Bondeau, A., Böttcher, K., Doktor, D., Lucht, W., Schaber, J., Sitch, S.  
837 2004. Responses of spring phenology to climate change. *New Phytol.* 162, 295-309.  
838 <https://doi.org/10.1111/j.1469-8137.2004.01059.x>
- 839 Baldocchi, D.D., Falge, E., Gu, L., Olson, R., Hollinger, D., Running, S., Anthoni, P.,  
840 Bernhofer, Ch., Davis, K., Fuentes, J., Goldstein, A., Katul, G., Law, B., Lee, X., Malhi, Y.,  
841 Meyers, T., Munger, J.W., Oechel, W., Pilegaard, K., Schmid, H.P., Valentini, R., Verma, S.,  
842 Vesala, T., Wilson, K., Wofsy, S. 2001. FLUXNET: a new tool to study the temporal and  
843 spatial variability of ecosystem-scale carbon dioxide, water vapor and energy flux densities.  
844 *Bull Am Meteorol Soc* (2001), 2415-2435.  
845 [https://doi.org/10.1175/1520-0477\(2001\)082%3C2415:FANTTS%3E2.3.CO;2](https://doi.org/10.1175/1520-0477(2001)082%3C2415:FANTTS%3E2.3.CO;2)
- 846 Baldocchi, D. D., Matt, D. R., Hutchison, B. A., McMillen, R. T. 1984. Solar radiation  
847 within an oak-hickory forest: an evaluation of extinction coefficients for several radiation  
848 components during fully leafed and leafless periods. *Agric For Meteorol* 32, 307-322.  
849 [https://doi.org/10.1016/0168-1923\(84\)90056-X](https://doi.org/10.1016/0168-1923(84)90056-X)
- 850 Campbell, G.S., Norman, J.M. 1998. The Light Environment of Plant Canopies. In: An  
851 Introduction to Environmental Biophysics. Springer, New York, NY0.
- 852 Campbell, G. S. 1986. Extinction coefficients for radiation in plant canopies calculated  
853 using an ellipsoidal inclination angle distribution. *Agric For Meteorol* 36:3, 17-321.  
854 [https://doi.org/10.1016/0168-1923\(86\)90010-9](https://doi.org/10.1016/0168-1923(86)90010-9)
- 855 Delpierre, N., Soudani, K., Francois, C., Köstner, B., Pontailier, J. -Y., Nikinmaa, E., ...  
856 and Grünwald, T. 2009a. Exceptional carbon uptake in European forests during the warm  
857 spring of 2007: a data-model analysis. *Global Change Biology* 15, 1455-1474.  
858 <https://doi.org/10.1111/j.1365-2486.2008.01835.x>

- 859 Delpierre, N., Dufrêne, E., Soudani, K., Ulrich, E., Cecchini, S., Boé, J., and François, C.  
860 2009b. Modelling interannual and spatial variability of leaf senescence for three deciduous  
861 tree species in France. *Agric For Meteorol* 149, 938-948.  
862 <https://doi.org/10.1016/j.agrformet.2008.11.014>
- 863 Delpierre, N., Berveiller, D., Granda, E. and Dufrêne, E. 2016. Wood phenology, not  
864 carbon input, controls the interannual variability of wood growth in a temperate oak forest.  
865 *New Phytol.* 210, 459-470. <https://doi.org/10.1111/nph.13771>
- 866 Delpierre, N., Soudani, K., Berveiller, D., Dufrêne, E., Hmimina, G., Vincent, G., 2020.  
867 “Green pointillism”: detecting the within-population variability of budburst in temperate  
868 deciduous trees with phenological cameras. *Int J Biometeorol* 64, 663-670.  
869 <https://doi.org/10.1101/771477>
- 870 Denéchère, R., Delpierre, N., Apostol, E., Berveiller, D., Bonne, F., Cole, E., Delzon, S.,  
871 Dufrêne, E., Gressler, E., Jean, F., Lebourgeois, F., Liu, G., Louvet, J., Parmentier, J.,  
872 Soudani, K., and Vincent, G. 2019. The within-population variability of leaf spring and  
873 autumn phenology is influenced by temperature in temperate deciduous trees. *Int J*  
874 *Biometeorol* (2019),. <https://doi.org/10.1007/s00484-019-01762-6>
- 875 Dragoni, D., Schmid, H.P., Wayson, C.A., Potter, H., Grimmond C.S.B., Randolph J.C.  
876 2011. Evidence of increased net ecosystem productivity associated with a longer vegetated  
877 season in a deciduous forest in south-central Indiana, USA. *Glob Chang Biol* 17, 886-897.  
878 <https://doi.org/10.1111/j.1365-2486.2010.02281.x>
- 879 Eklundh, L., Jin, H., Schubert, P., Guzinski, R., Heliasz, M. 2011. An optical sensor  
880 network for vegetation phenology monitoring and satellite data calibration. *Sensors* 11,  
881 7678-709. <https://doi.org/10.3390/s110807678>
- 882 Franz, D., Acosta, M., Altimir, N., et al. 2018. Towards long-term standardised carbon  
883 and greenhouse gas observations for monitoring Europe’s terrestrial ecosystems: a  
884 review. *Int Agrophys* 32, 39-455. <https://doi:10.1515/intag-2017-0039>
- 885 Garrity, S.R., Bohrer, G., Maurer K.D., Mueller K.L., Vogel C.S., Curtis P.S. 2011. A  
886 comparison of multiple phenology data sources for estimating seasonal transitions in  
887 deciduous forest carbon exchange. *Agric For Meteorol* 151, 1741–1752. [DOI:  
888 10.1016/j.agrformet.2011.07.008](https://doi.org/10.1016/j.agrformet.2011.07.008)
- 889 Gielen, B., Acosta, M., Altimir, N. et al. 2018. Ancillary vegetation measurements at  
890 ICOS ecosystem stations. *Int Agrophys* 10, 645–664.  
891 <https://doi.org/10.1515/intag-2017-0048>
- 892 Gonsamo, A., Chen, J.M., D’Odorico, P. 2013. Deriving land surface phenology  
893 indicators from CO2 eddy covariance measurements. *Ecol. Indic.* 29, 203-207.  
894 <https://doi.org/10.1016/j.ecolind.2012.12.026>
- 895 Goulden, M.L., Munger, J.W., Fan, S.M., Daube, B.C., Wofsy, S.C. 1996. Exchange of  
896 carbon dioxide by a deciduous forest: response to interannual climate variability. *Science*  
897 271, 1576–1578. [https://DOI: 10.1126/science.271.5255.1576](https://DOI:10.1126/science.271.5255.1576)
- 898 Hmimina, G., Dufrene, E., Pontailier, J.- Y., Delpierre, N., Aubinet, M., Caquet, B.,  
899 de Grandcourt, A., Burban, B., Flechard, C., Granier, A., Gross, P., Heinesch, B., Longdoz,  
900 B., Moureaux, C., Ourcival, J.-M., Rambal, S., Saint-André, L., Soudani, K. 2013.  
901 Evaluation of the potential of MODIS satellite data to predict vegetation phenology in  
902 different biomes: An investigation using ground based NDVI measurements. *Remote Sens*  
903 *Environ* 132, 145-158. <https://doi.org/10.1016/j.rse.2013.01.010>
- 904 Holst, T, Hauser, S, Kirchgäßner, A, Matzarakis, A, Mayer, H and Schindler, D. 2004.  
905 Huemmrich, K. F., Black, T. A., Jarvis, P. G., McCaughey, J. H., and Hall, F. G. 1999.  
906 High temporal resolution NDVI phenology from micrometeorological radiation sensors. *J.*  
907 *Geophys. Res.*,104(D22), 27935–27944. <https://doi.org/10.1029/1999JD900164>
- 908 Ide, R., Oguma, H., 2010. Use of digital cameras for phenological observations. *Ecol*  
909 *Inform*, 5, 339–347. <https://doi.org/10.1016/j.ecoinf.2010.07.002>



- 910 Jenkins, JP, Richardson, A .D., Braswell, B.H., Ollinger ,S.V., Hollinger, D.Y., Smith  
911 ,M-L. 2006. Refining light-use efficiency calculations for a deciduous forest canopy using  
912 simultaneous tower-based carbon flux and radiometric measurements. *Agric For Meteorol*  
913 *143*, 64–79. <https://doi.org/10.1016/j.agrformet.2006.11.008>
- 914 Keenan, T. F., Darby, B., Felts, E., Sonnentag ,O., Friedl, M. A., Hufkens, K., O'Keefe,  
915 J., Klosterman, S., Munger, J. W., Toomey, M., Richardson, A. D. 2014. Tracking Forest  
916 Phenology and Seasonal Physiology Using Digital Repeat Photography: A Critical  
917 Assessment. *Ecol Appl*, *24*, 1478-489. <https://doi.org/10.1890/13-0652.1>
- 918 Klosterman, S.T., Hufkens, K., Gray, J.M., Melaas, E., Sonnentag, O., Lavine, I.,  
919 Mitchell, L., Norman, R., Friedl, M.A., Richardson, A.D. 2014. Evaluating remote sensing of  
920 deciduous forest phenology at multiple spatial scales using PhenoCam imagery.  
921 *Biogeosciences 11 (16)*,4305-4320. <https://doi.org/10.5194/bg-11-4305-2014>
- 922 Kobayashi, H., Nagai, S., Kim, Y., Yang, W., Ikeda, K., Ikawa, H., Nagano, H., Suzuki,  
923 R., 2018. *In situ* observations reveal how spectral reflectance responds to growing season  
924 phenology of an open evergreen forest in Alaska. *Remote Sens.* *10*, 1071.  
925 <https://doi.org/10.3390/rs10071071>
- 926 Link, TE., Marks, D., Hardy, J. 2004. A deterministic method to characterize canopy  
927 radiative transfer properties. *Hydrol Process* *18*, 3583–3594.  
928 <https://doi.org/10.1002/hyp.5793>
- 929 Liu, F., Wang, X., Wang, Ch. 2019. Autumn phenology of a temperate deciduous forest:  
930 Validation of remote sensing approach with decadal leaf-litterfall measurements. *Agric For*  
931 *Meteorol.*,*15*, 107758 .<https://doi.org/10.1016/j.agrformet.2019.107758>
- 932 Liu, Y., Wu, Ch., Sonnentag, O., Desai, A.R., Wang, J. 2020. Using the red chromatic  
933 coordinate to characterize the phenology of forest canopy photosynthesis. *Agric For*  
934 *Meteorol* ? 285–286. <https://doi.org/10.1016/j.agrformet.2020.107910>
- 935 Liu, Z., Hu, H., Yu, H., Yang, X., Yang, H., Ruan, C., Wang, Y., Tang, J. 2015.  
936 Relationship between leaf physiologic traits and canopy color indices during the leaf  
937 expansion period in an oak forest. *Ecosphere* *6*, 259. <https://doi.org/10.1890/ES14-00452.1>
- 938 Lu, X.; Liu, Z.; Zhou, Y.; Liu, Y.; An, S.; Tang, J. 2018. Comparison of Phenology  
939 Estimated from Reflectance-Based Indices and Solar-Induced Chlorophyll Fluorescence  
940 (SIF) Observations in a Temperate Forest Using GPP-Based Phenology as the  
941 Standard. *Remote Sens.* *2018*, *10*, 932. <https://doi.org/10.3390/rs10060932>
- 942 McCree, K.J., 1972. Test of current definitions of photosynthetically active radiation  
943 against leaf photosynthesis data. *Agricultural Meteorology* *10*, 443–453.  
944 [https://doi.org/10.1016/0002-1571\(72\)90045-3](https://doi.org/10.1016/0002-1571(72)90045-3)
- 945 Measuring and modelling plant area index in beech stands. *Int J Biometeorol*  
946 *48*,192–201. <https://doi.org/10.1007/s00484-004-0201-y>
- 947 Menzel, A., Sparks, T.H., Estrella, N., Koch, E. et al. 2006. European phenological  
948 response to climate change matches the warming pattern. *Glob Change Biol* *12*: 1969–1976.  
949 <https://doi.org/10.1111/j.1365-2486.2006.01193.x>
- 950 Motohka, T., Nasahara, K.N., Oguma, H., Tsuchida, S. (2010) Applicability of  
951 green–red vegetation index for remote sensing of vegetation phenology. *Remote Sens.*  
952 *2*,2369–2387. <https://doi.org/10.3390/rs2102369>
- 953 Nagai, S., Saitoh, T.M., Kobayashi, H., Ishihara, M., Motohka, T., Suzuki, R., Nasahara,  
954 K.N., Muraoka, H. 2012. In situ examination for the relationship between various vegetation  
955 indices and tree phenology in an evergreen coniferous forest, Japan. *Int J Remote Sens* *33*,  
956 6202–6214. <https://doi.org/10.1080/01431161.2012.682660>
- 957 Perot,T., Balandier, P., Couteau, C., Perret, S., Seigner, V., Korboulewsky, N. 2019.  
958 Transmitted light as a tool to monitor tree leaf phenology and development applied to  
959 *Quercus petraea*. *Agric For Meteorol* *275*, 37-46.  
960 <https://doi.org/10.1016/j.agrformet.2019.05.010>

- 961 Petach, A.R., Toomey, M., Aubrecht, D.M., Richardson, A.D. 2014. Monitoring  
962 vegetation phenology using an infrared-enabled security camera. *Agric For Meteorol*  
963 *195–196*,143–51. <https://doi.org/10.1016/j.agrformet.2014.05.008>
- 964 Piao, S., Liu, Q., Chen, A., Janssens, I., Fu, Y., Dai, J., Liu, L., Lian, X., Shen, M., Zhu,  
965 X. 2019. Plant phenology and global climate change: current progresses and challenges.  
966 *Glob Change Biol.* <https://doi.org/10.1111/gcb.14619>
- 967 Pontailler, J. -Y., Hymus, G. J., Drake, B. G. 2003. Estimation of leaf area index using  
968 ground-based remote sensed NDVI measurements: Validation and comparison with two  
969 indirect techniques. *Can J Remote Sens*, *29*, 381–387. <https://doi.org/10.5589/m03-009>
- 970 Pontailler, J.-Y. 1990. A Cheap Quantum Sensor Using a Gallium Arsenide Photodiode.  
971 *Funct Ecol* *4*, 591–596. <https://doi.org/10.2307/2389327>
- 972 Richardson A.D., Black T.A., Ciais P., Delbart N., Friedl M.A., Gobron N., Hollinger  
973 D.Y., Kutsch W.L., Longdoz B., Luyssaert S., Migliavacca M., Montagnani L., Munger  
974 J.W., Moors E., Piao S., Rebmann C., Reichstein M., Saigusa N., Tomelleri E., Vargas R.,  
975 Varlagin A. 2010. Influence of spring and autumn phenological transitions on forest  
976 ecosystem productivity. *Philos. Trans. R. Soc. Lond., B, Biol. Sci.*, *365*,3227–3246.  
977 <https://dx.doi.org/10.1098%2Frstb.2010.0102>
- 978 Richardson, A. D., Jenkins, J. P., Braswell, B. H., Hollinger, D. Y., Ollinger, S. V.,  
979 Smith M. L. 2007. Use of digital webcam images to track spring green-up in a deciduous  
980 broadleaf forest. *Oecologia* *152*, 323–334. <https://doi.org/10.1007/s00442-006-0657-z>
- 981 Richardson, A.D., 2019. Tracking seasonal rhythms of plants in diverse ecosystems with  
982 digital camera imagery. *New Phytolo.* *222*, 1742–1750. <https://doi.org/10.1111/nph.15591>
- 983 Richardson, A.D., Hufkens, K., Milliman, T., Aubrecht, D.M., Chen, M., Gray, J.M.,  
984 Johnston, M.R., Keenan, T.F., Klosterman, S.T., Kosmala, M., Melaas, E.K., Friedl, M.A.,  
985 Frohling, S., 2018. Tracking vegetation phenology across diverse North American biomes  
986 using PhenoCam imagery. *Sci Data* *5*, 1–24. <https://doi.org/10.1038/sdata.2018.28>
- 987 Richardson, A.D., Keenan, T.F., Migliavacca, M., Ryu, Y., Sonnentag, O., Toomey, M.  
988 2013. Climate change, phenology, and phenological control of vegetation feedbacks to the  
989 climate system. *Agric For Meteorol* *169*,156–173.  
990 <https://doi.org/10.1016/j.agrformet.2012.09.012>
- 991 Rocha, A.V., Shaver, G.R. 2009. Advantages of a two band EVI calculated from solar  
992 and photosynthetically active radiation fluxes. *Agric For Meteorol* *149*,1560–1563.  
993 <https://doi.org/10.1016/j.agrformet.2009.03.016>
- 994 Roetzer T., Wittenzeller M., Haeckel H., Nekovar J. 2000. Phenology in central Europe:  
995 difference and trends of spring phenophases in urban and rural areas. *Int J Biometeorol*, *44*,  
996 60–66. <https://doi.org/10.1007/s004840000062>
- 997 Ryu, Y., Baldocchi, D.D., Verfaillie, J., Ma, S., Falk, M., Ruiz-Mercado, I., et al.  
998 2010. Testing the performance of a novel spectral reflectance sensor, built with light emitting  
999 diodes (LEDs), to monitor ecosystem metabolism, structure and function. *Agric For*  
1000 *Meteorol* *150*,1597–1606. <https://doi.org/10.1016/j.agrformet.2010.08.009>
- 1001 Sakamoto, T., Gitelson, A.A., Nguy-Robertson, A.L., Arkebauer, T.J., Wardlow, B.D.,  
1002 Suyker, A.E., Verma, S.B., Shibayama, M. 2010. An alternative method using digital  
1003 cameras for continuous monitoring of crop status. *Agric For Meteorol* *154–155*, 113–126.  
1004 <https://doi.org/10.1016/j.agrformet.2011.10.014>
- 1005 Schaber, J. 2002. Phenology in Germany in the 20th century: methods, analyses and  
1006 models. University of Potsdam, Germany.
- 1007 Schaber, J., Badeck, F.W. 2002. Evaluation of methods for the combination of  
1008 phenological time series and outlier detection. *Tree Physiol* *22*, 973–982.  
1009 <https://doi.org/10.1093/treephys/22.14.973>

- 1010 Sims, D.A., Gamon, J.A. 2002. Relationship between leaf pigment content and spectral  
1011 reflectance across a wide range species, leaf structures and development stages. *Remote Sens*  
1012 *Environ* 81, 337– 354. [https://doi.org/10.1016/S0034-4257\(02\)00010-X](https://doi.org/10.1016/S0034-4257(02)00010-X)
- 1013 Sonnentag, O., Hufkens, K., Teshera-Sterne, C., Young, A.M., Friedl, M., Braswell,  
1014 B.H., Milliman, T., O’Keefe, J., Richardson, A.D. 2012. Digital repeat photography for  
1015 phenological research in forest ecosystems. *Agric For Meteorol* 152, 159–177.  
1016 <https://doi.org/10.1016/j.agrformet.2011.09.009>
- 1017 Soudani, K., Hmimina, G., Delpierre, N., Pontailleur, J.-Y., Aubinet, M., Bonal, D.,  
1018 Caquet, B., de Grandcourt, A., Burban, B., Flechard, C., Guyon, D., Granier, A., Gross, P.,  
1019 Heinesh, B., Longdoz, B., Loustau, D., Moureaux, C., Ourcival, J.-M., Rambal, S., Saint  
1020 André, L., Dufrêne, E., 2012. Ground-based Network of NDVI measurements for tracking  
1021 temporal dynamics of canopy structure and vegetation phenology in different biomes.  
1022 *Remote Sens Environ*, 123, 234–245. <https://doi.org/10.1016/j.rse.2012.03.012>
- 1023 Soudani, K., le Maire, G., Dufrêne, E., François, C., Delpierre, N., Ulrich, E., and  
1024 Cecchini, S. 2008. Evaluation of the onset of green-up in temperate deciduous broadleaf  
1025 forests derived from Moderate Resolution Imaging Spectroradiometer (MODIS) data.  
1026 *Remote Sens Environ* 12, 2643–2655. <https://doi.org/10.1016/j.rse.2007.12.004>
- 1027 Sparks, T.H., Carey, P.D. 1995. The responses of species to climate over two centuries:  
1028 an analysis of the Marsham phenological record, 1736-1947. *J. Ecol.* 83, 321-329.  
1029 <https://doi.org/10.2307/2261570>
- 1030 Templ, B., Koch, E., Bolmgren, K., Ungersböck M., Paul, A., Scheifinger, H.,  
1031 Rutishauser, T., Busto, M., Chmielewski, F.M., Hajkova, L., Hodzic ,S., Kaspar, F.,  
1032 Pietragalla, B., Romero-Fresneda, R., Tolvanen, A., Vucetic, V., Zimmermann, K., Zust, A.  
1033 2018. Pan European phenological database (PEP725): a single point of access for european  
1034 data. *Int J Biometeorol* 62:1109–1113. <https://doi.org/10.1007/s00484-018-1512-8>
- 1035 Toda, M., Richardson A.D. 2018. Estimation of plant area index and phenological  
1036 transition dates from digital repeat photography and radiometric approaches in a hardwood  
1037 forest in the Northeastern United States. *Agric For Meteorol* 249:457–466.  
1038 <https://doi.org/10.1016/j.agrformet.2017.09.004>
- 1039 Toomey, M. , Friedl, M.A., Frohling, S. , et al . 2015 . Greenness indices from digital  
1040 cameras predict the timing and seasonal dynamics of canopy scale photosynthesis . *Ecol*  
1041 *Appl* 25, 99 – 115. <https://doi.org/10.1890/14-0005.1>
- 1042 Wang, Q., Tenhunen, J., Dinh, N.Q., Reichstein, M., Vesala, T., Keronen, P. 2004.  
1043 Similarities in ground- and satellite-based NDVI time-series and their relationship to  
1044 physiological activity of a Scots pine forest in Finland. *Remote Sens Environ*, 2004;  
1045 93:225–237. <https://doi.org/10.1016/j.rse.2004.07.006>,
- 1046 Wang, Q., Tenhunen, J., Schmidt, M., Kolcun, O., Droesler, M., Reichstein, M., 2006.  
1047 Estimation of total, direct and diffuse PAR under clear skies in complex alpine terrain of the  
1048 National Park Berchtesgaden, Germany. *Ecol Modell* 196, 149–162.  
1049 <https://doi.org/10.1016/j.ecolmodel.2006.02.005>
- 1050 Webster, C., Rutter, N., Zahner, F., Jonas, T. 2016. Measurement of incoming radiation  
1051 below forest canopies: A comparison of different radiometer configurations. *J*  
1052 *Hydrometeorol*, 17, 853–864. <https://doi.org/10.1175/JHM-D-15-0125.1>
- 1053 Wilson, T.B., Meyers, T.B., 2007. Determining vegetation indices from solar and  
1054 photosynthetically active radiation fluxes. *Agric For Meteorol* 144, 160–179.  
1055 <https://doi.org/10.1016/j.agrformet.2007.04.001>
- 1056 Wingate, L., Ogeé, J., Cremonese et al. 2015. Interpreting canopy development and  
1057 physiology using a European phenology camera network at flux sites. *Biogeosciences* 12,  
1058 5995–6015. <https://doi.org/10.5194/bg-12-5995-2015>

- 1059 Wohlfahrt, G, Pilloni, S, Hörtnagl, L, Hammerle, A. 2010. Estimating Carbon Dioxide  
1060 Fluxes from Temperate Mountain Grasslands Using Broad-Band Vegetation  
1061 Indices. *Biogeosciences* 2010, 7, 683–694. <https://doi.org/10.5194/bg-7-683-2010>  
1062 Wu, C., Peng, D., Soudani, K., Siebicke, L., Gough, C.M., Arain, M. A., Bohrer, G.,  
1063 Lafleur, P.M., Peichl M., Gonsamo, A., Shiguang, X., Fang, B., Quansheng, G. 2017. Land  
1064 surface phenology derived from normalized difference vegetation index (NDVI) at global  
1065 FLUXNET sites. *Agric For Meteorol* 233, 171–182.  
1066 <https://doi.org/10.1016/j.agrformet.2016.11.193>  
1067 Yang, X., Tang, J., Mustard, J. F . 2014. Beyond leaf color: Comparing camera-based  
1068 phenological metrics with leaf biochemical, biophysical, and spectral properties throughout  
1069 the growing season of a temperate deciduous forest. *J. Geophys. Res. Biogeosci.* 119,  
1070 181–191 (2014). <https://doi.org/10.1002/2013JG002460>  
1071 Zhang, X., Friedl, M.A., Schaaf, C. B., Strahler, A. H., Hodges, J. C. F., Gao, F., Reed,  
1072 B. C., and Huete, A. 2003. Monitoring vegetation phenology using MODIS. *Remote Sens*  
1073 *Environ*, 84, 471–475, 2003. [https://doi.org/10.1016/S0034-4257\(02\)00135-9](https://doi.org/10.1016/S0034-4257(02)00135-9)

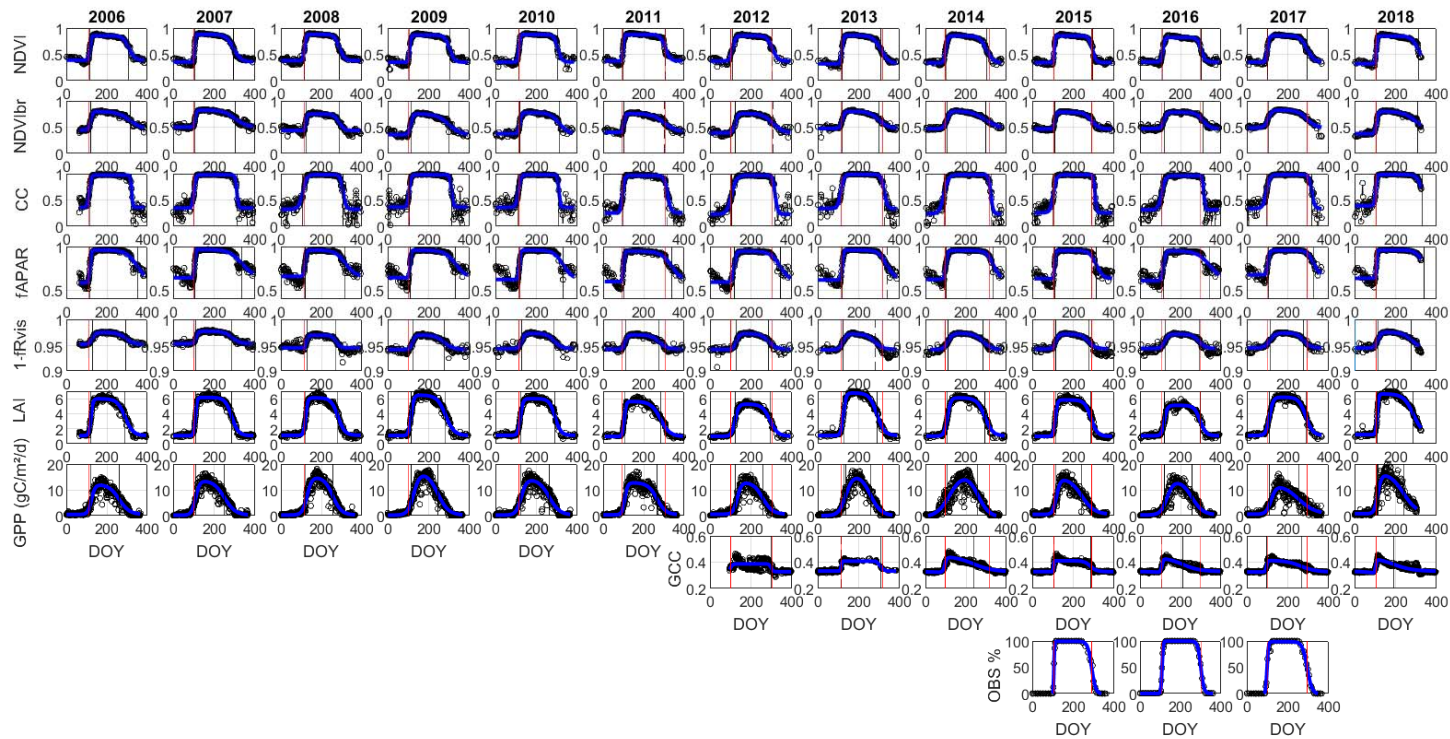

1074

1075

**Supplementary Fig.1:** Time-series of NDVI (Normalized Difference Vegetation Index), broad-band NDVI (NDVI<sub>br</sub>),  $1-fR_{vis}$  (fraction of reflected

1076

radiation),  $fAPAR$  (fraction of absorbed PAR), LAI (Leaf Area Index), CC (Canopy Closure) and GPP (Gross Primary Production) over the period

1077

2006-2018, GCC (Greenness Chromatic Coordinate) over the period 2012-2018 and human-eye observations OBS based on an intensive sampling

1078

over 2015-2017. Circle: data; continuous curve (blue): fitted ADS function. Vertical lines: observed phenological dates (red) and predicted dates

1079

(black) in spring (BB-OBS over 200-2018) and autumn (LS-OBS 2011-2017).

1080

| Method                                                                                        | Spring budburst |     |     | Autumn leaf senescence and leaf fall |     |     |
|-----------------------------------------------------------------------------------------------|-----------------|-----|-----|--------------------------------------|-----|-----|
|                                                                                               | SOS             | MOS | EOS | SOF                                  | MOF | EOF |
| <b>OBS: 2006-2018</b><br><i>2012-2018 (spring) and 2012-2017 (autumn)</i><br><i>2015-2017</i> | -               | 106 | -   | -                                    | -   | -   |
|                                                                                               | -               | 104 | -   | -                                    | 303 | -   |
|                                                                                               | 97              | 104 | 111 | 272                                  | 295 | 317 |
| <b>NDVI</b>                                                                                   | 100             | 109 | 117 | 269                                  | 301 | 332 |
|                                                                                               | 98              | 108 | 118 | 268                                  | 300 | 332 |
|                                                                                               | 98              | 107 | 115 | 269                                  | 296 | 323 |
| <b>NDVI<sub>br</sub></b>                                                                      | 100             | 114 | 126 | 243                                  | 302 | 360 |
|                                                                                               | 97              | 113 | 127 | 244                                  | 299 | 353 |
|                                                                                               | 96              | 111 | 125 | 254                                  | 298 | 341 |
| <b>GCC</b>                                                                                    | -               | -   | -   | -                                    | -   | -   |
|                                                                                               | 96              | 104 | 110 | 209                                  | 267 | 321 |
|                                                                                               | 98              | 103 | 108 | 199                                  | 254 | 323 |
| <b><math>fR_{vis}</math></b>                                                                  | 101             | 119 | 137 | 237                                  | 281 | 324 |
|                                                                                               | 97              | 118 | 139 | 238                                  | 282 | 325 |
|                                                                                               | 94              | 116 | 139 | 241                                  | 281 | 320 |
| <b><math>fAPAR</math></b>                                                                     | 103             | 111 | 119 | 280                                  | 334 | 375 |
|                                                                                               | 102             | 111 | 120 | 284                                  | 332 | 367 |
|                                                                                               | 101             | 110 | 119 | 278                                  | 327 | 354 |
| <b>CC</b>                                                                                     | 87              | 104 | 120 | 303                                  | 316 | 329 |
|                                                                                               | 83              | 103 | 122 | 304                                  | 318 | 330 |
|                                                                                               | 82              | 102 | 121 | 302                                  | 313 | 323 |
| <b>LAI</b>                                                                                    | 101             | 116 | 129 | 246                                  | 288 | 330 |
|                                                                                               | 100             | 116 | 130 | 251                                  | 291 | 330 |
|                                                                                               | 98              | 115 | 131 | 254                                  | 290 | 327 |
| <b>GPP</b>                                                                                    | 95              | 123 | 152 | 203                                  | 253 | 317 |
|                                                                                               | 96              | 125 | 158 | 204                                  | 251 | 321 |
|                                                                                               | 94              | 123 | 152 | 202                                  | 249 | 326 |

1081

1082 **Supplementary Table I:** Average phenological dates observed and estimated from the  
1083 different methods and using the six phenological markers (SOS, MOS, EOS, SOF, MOF,  
1084 EOF). In each cell, the first line corresponds to average dates calculated over the whole  
1085 period 2006-2018. The second line corresponds to average dates calculated over 2012-2018  
1086 in the spring and over 2012-2017 in the autumn (the two periods that are common to all  
1087 methods in spring and in autumn, respectively). The third line corresponds to average dates  
1088 calculated over 2015-2017 for which the six phenological metrics are determined from the  
1089 intensive sampling protocol.

1090

1091

1092

1093

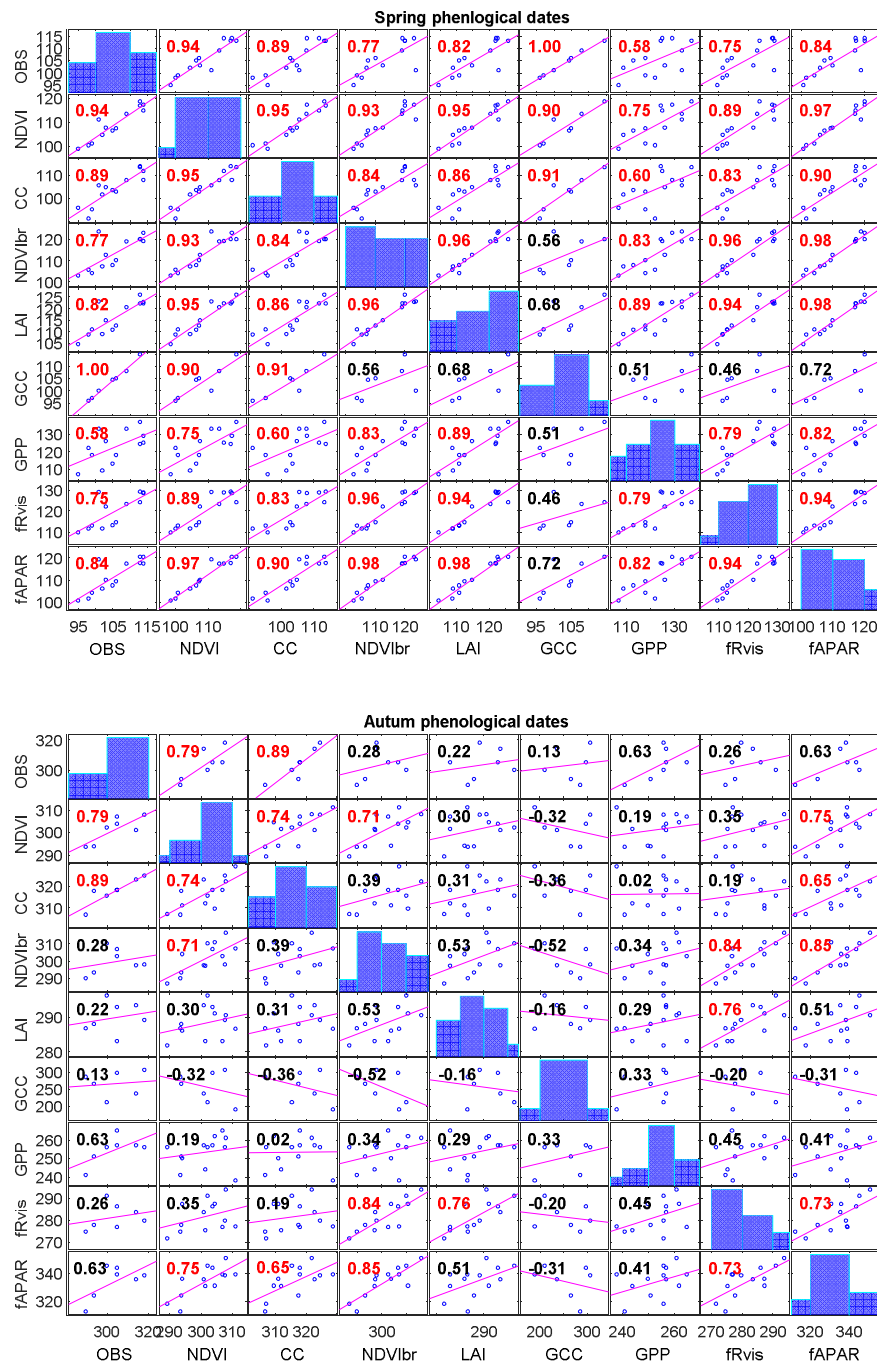

1094 **Supplementary Fig.2** : Correlation matrix of MOS and MOF between the different methods  
 1095 : Human-eye observations (BB-OBS and LS-OBS), NDVI (Normalized Difference  
 1096 Vegetation Index), GCC (Greenness Chromatic Coordinate), broad-band NDVI (NDVibr),  
 1097  $fR_{vis}$  (fraction of reflected radiation),  $fAPAR$  (fraction of absorbed PAR), LAI (Leaf Area  
 1098 Index), CC (Canopy Closure) and GPP (Gross Primary Production). Pearson's coefficient of  
 1099 correlation: significant at 5% in red, not significant in black.

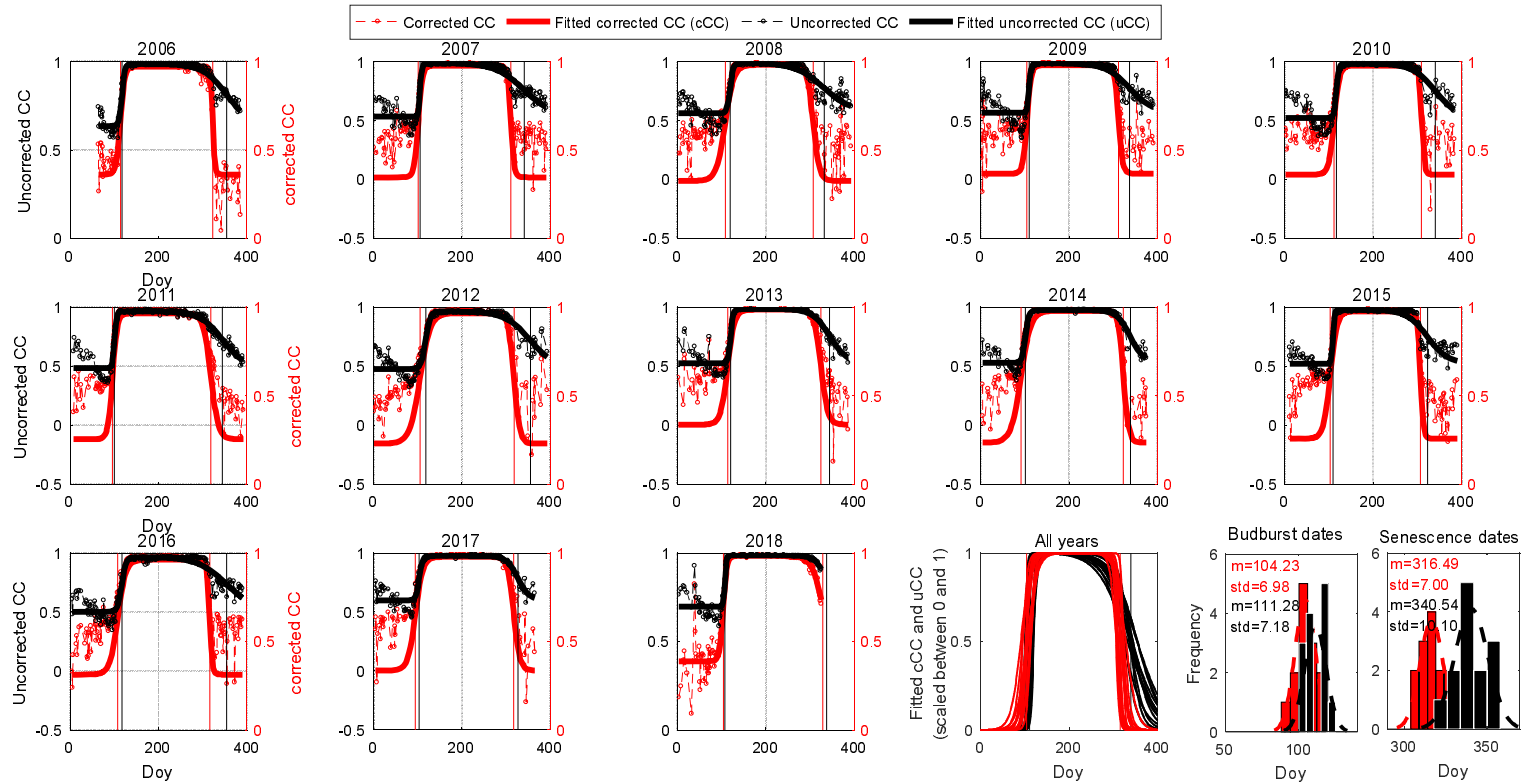

1100  
 1101  
 1102  
 1103  
 1104  
 1105

**Supplementary Fig.3:** Time-series of cosine corrected (red) and uncorrected canopy closure (black) over 2006-2018. Circle: data; continuous curves : fitted time-series using ADS function. Vertical lines: predicted phenological dates from corrected (red) and uncorrected CC (black) in spring and autumn. Penultimate and last subplots are fitted time-series for all years scaled between 0 and 1 and histograms of predicted phenological dates in spring and autumn from cosine corrected (red) and uncorrected CC (black). Mean (m) and standard deviation (std) are superimposed on the histograms.



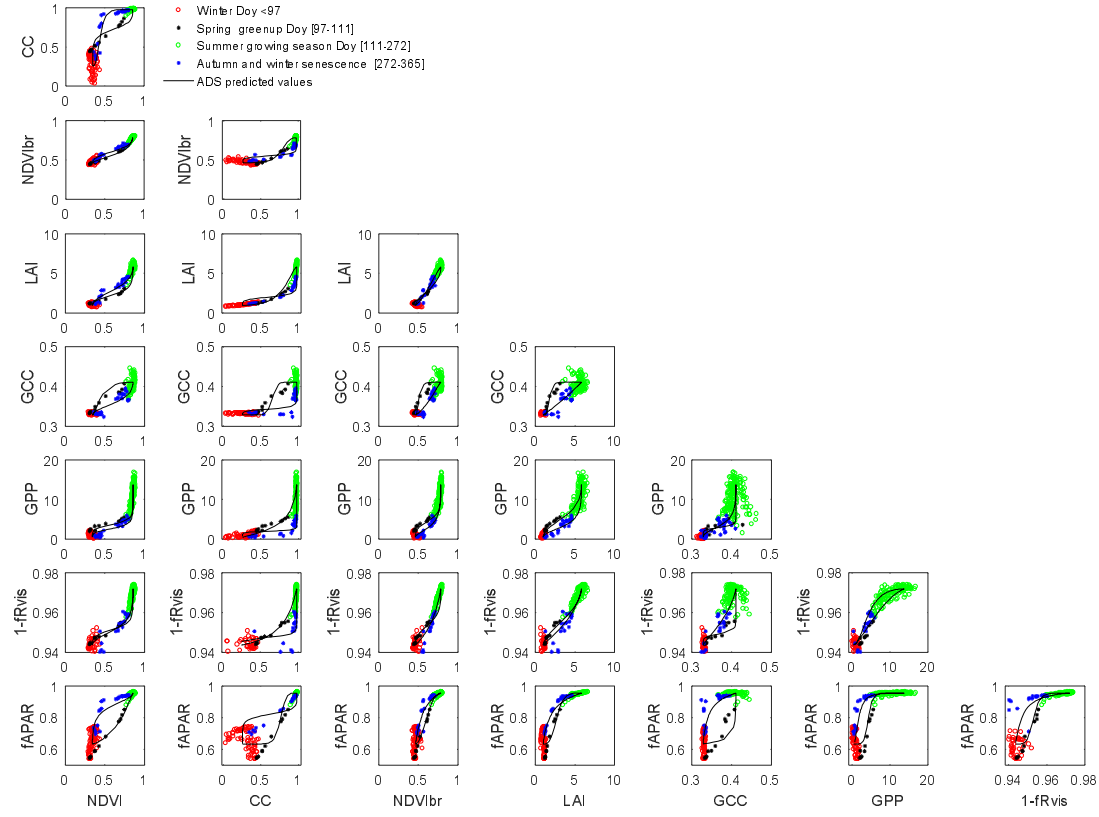

1106  
 1107 **Supplementary Fig.4:** Relationships between the different variables during 2015. Four phenological phases are distinguished: the winter phase (red,  
 1108 DoY 1-97), the budburst and leaf expansion phase in spring (black, DoY 97-111), the summer growing season (green, DoY 111-272) and the autumn  
 1109 and winter senescence phase (DoY 272-365). The date ranges are determined by considering the average observed phenological dates during the period  
 1110 2015-2017 (the *suppl. Table I*).
